1 **TITLE:** Time-course RNASeq of *Camponotus floridanus* forager and nurse ant brains  
2 indicate links between plasticity in the biological clock and behavioral division of labor

3

4 **AUTHORS:** Biplabendu Das<sup>1,2\*</sup>, Charissa de Bekker<sup>1,2\*</sup>

5

6 \*Corresponding authors: [biplabendu.das@knights.ucf.edu](mailto:biplabendu.das@knights.ucf.edu); [charissa.debekker@ucf.edu](mailto:charissa.debekker@ucf.edu)

7 <sup>1</sup>Department of Biology, College of Sciences, University of Central Florida, Orlando,  
8 Florida, 32816

9 <sup>2</sup>Genomics and Bioinformatics Cluster, University of Central Florida, Orlando, Florida,  
10 32816

## 11 **Abstract**

12 Background: Circadian clocks allow organisms to anticipate daily fluctuations in their  
13 environment by driving rhythms in physiology and behavior. Inter-organismal differences in  
14 daily rhythms, called chronotypes, exist and can shift with age. In ants, age, caste-related  
15 behavior and chronotype appear to be linked. “Around-the-clock” active nurse ants are  
16 usually younger and, with age, transition into rhythmically active foragers. Moreover, ants  
17 can shift between these behavioral castes depending on social context. We investigated how  
18 changes in daily gene expression could be contributing to such behavioral plasticity in  
19 *Camponotus floridanus* carpenter ants by combining time-course behavioral assays and  
20 RNA-Sequencing of forager and nurse brains.

21

22 Results: We found that nurse brains have three times fewer 24h oscillating genes than  
23 foragers. However, several hundred genes that oscillated every 24h in forager brains showed  
24 robust 8h oscillations in nurses, including the core clock genes *Period* and *Shaggy*. These  
25 differentially rhythmic genes consisted of several components of the circadian entrainment  
26 pathway, and showed enrichments for functions related to metabolism, cellular  
27 communication and protein modification. We additionally found that *Vitellogenin*, known to  
28 regulate division of labor in social insects, showed robust 24h oscillations in nurse brains but  
29 not in foragers. Furthermore, the protein products of several genes that were differentially  
30 expressed between the two ant castes were previously found in the trophallactic fluid of *C.*  
31 *floridanus*. This suggests a putative role for trophallaxis in regulating behavioral division of  
32 labor through caste-specific gene expression.

33

34 Conclusion: We provide a first look at the chronobiological differences in gene expression  
35 between forager and nurse ant brains. This endeavor allowed us to identify putative

36 molecular mechanisms underlying plastic timekeeping. Several components of the ant  
37 circadian clock and its output can seemingly oscillate at different harmonics of the circadian  
38 rhythm. We propose that such chronobiological plasticity has evolved to allow for distinct  
39 regulatory networks that underlie behavioral castes, while supporting swift caste transitions  
40 in response to colony demands. Behavioral division of labor is common among social insects.  
41 The links between chronobiological and behavioral plasticity that we found in *C. floridanus*,  
42 thus, likely represent a more general phenomenon that warrants further investigation.  
43  
44 Keywords: carpenter ants, behavioral division of labor, circadian rhythms, ultradian rhythms,  
45 time-course RNASeq

## 46 **Background**

47 Living organisms exhibit adaptive rhythms in physiology and behavior as a way to  
48 anticipate predictable daily fluctuations in their environment [1-3]. Such daily rhythms are  
49 ubiquitous and have been discovered in both unicellular and multicellular organisms [4-9],  
50 including eusocial Hymenopterans such as ants and bees [10-16]. These rhythms are driven  
51 by endogenous molecular feedback loops that are capable of entraining to external time cues,  
52 known as Zeitgebers, which can be both abiotic (e.g., light and temperature cycles) and biotic  
53 (e.g., presence of food and predators) [17-20]. In the majority of model organisms studied  
54 thus far, light appears to be the strongest Zeitgeber [19, 21]. However, it has been suggested  
55 that in Hymenopterans with complex social behaviors, temperature cues and social  
56 environment could be more potent Zeitgebers than light [22-26]. Though, a more thorough  
57 molecular understanding of the Hymenopteran clock and its role in the social organization of  
58 insect colonies is needed to confirm this.

59 The limited knowledge that we currently have of the Hymenopteran clock stems from  
60 a handful of studies done with the honeybee *Apis mellifera* and a few ant species including  
61 the carpenter ant *Camponotus floridanus* [14-16, 27-29]. This is in stark contrast with our  
62 vast molecular understanding of the circadian clock of *Drosophila melanogaster*, which has  
63 been extensively studied and is often used as a reference model for insect circadian clocks in  
64 general (reviewed in [30-32]). At the cellular level, the circadian clock consists of an  
65 autoregulatory transcription-translation feedback loop (TTFL) that requires around (circa) 24  
66 hours (dia) to complete one cycle. The circadian TTFL is considered to be an ancient  
67 timekeeping mechanism conserved in plants, fungi and animals [2, 30, 33]. In the insect  
68 model organism *Drosophila*, the TTFL consists of the activator complex CLOCK-CYCLE  
69 (BMAL1-CLOCK in mammals) that binds to and activates transcription of the repressor gene  
70 *Period (Per)*. Upon translation in the cytoplasm, PER heterodimerizes with TIMELESS

71 (CRYPTOCHROME in mammals), translocates into the nucleus and inhibits the CLK-CYC  
72 activator complex, thus closing the feedback loop [34, 35]. This loop is further coupled with  
73 multiple auxiliary phosphorylation-dephosphorylation cycles, that are necessary for a  
74 functional 24-hour clock [34, 35]. Several kinases (e.g., Shaggy, Double-time, Nemo, Casein  
75 Kinase-2 and Protein Kinase A) and phosphatases (e.g., Protein phosphatase 1 and Protein  
76 phosphatase 2A) involved in such auxiliary cycles have been discovered in *Drosophila*  
77 (reviewed in [31]). Once entrained, the circadian clock drives daily oscillations in gene  
78 expression and protein production that in turn bring about rhythms in physiology (e.g.,  
79 metabolism and immune function) and behavior (e.g., locomotion and feeding) [36].

80         In addition to being endogenous and entrainable, circadian clocks are also inherently  
81 plastic; the phase, amplitude and period length with which circadian processes oscillate can  
82 change with an organism's age or social environment [37-42]. Such changes give rise to  
83 phenotypes that differ in their exact timing of activity onset relative to sunset or sunrise,  
84 known as "chronotypes" [43-46]. Social insects, which exhibit complex social organization  
85 and a decentralized division of colony labor, provide a striking example of plastic  
86 chronotypes which appear to be tightly associated with an individual's behavioral role or  
87 caste identity within the colony [47, 48]. In ants and bees, broadly two distinct behavioral  
88 castes emerge from division of colony labor among non-reproductive "workers": 1)  
89 extranidal foragers that primarily gather food in an environment with daily cycling abiotic  
90 conditions and 2) intranidal nurses that perform brood care within a nest with little to no  
91 abiotic fluctuations [49]. In most species studied so far, forager ants and bees show robust  
92 daily rhythms in locomotion and extranidal visits whereas nurses display "around-the-clock"  
93 activity patterns within the dark nest chambers [26, 47, 48, 50]. The presence or absence of  
94 circadian locomotory rhythms, thus, appear to be caste-associated. Seemingly, these rhythms  
95 are also plastic since foragers coerced into tending brood will begin to show "around-the-

96 clock” activity whereas brood-tending nurses develop robust locomotory rhythms upon  
97 removal from the colony [15, 25, 27, 51]. For example, in the carpenter ant *Camponotus*  
98 *rufipes*, nurses showed a rapid development of rhythmic activity patterns when isolated from  
99 the colony and placed under cycling light-dark conditions [48]. This rhythmic activity  
100 persisted under constant darkness conditions in the absence of brood [48]. Similarly, isolated  
101 individuals of the ant species *Diacamma indicum*, showed rhythmic activity under LD cycles  
102 in the absence of eggs and larvae, but transitioned to nurse-like “around-the-clock” activity in  
103 their presence [25]. As such, circadian rhythms in locomotory behavior appear to be  
104 regulated by an individual’s social context and behavioral role in the colony [25, 26, 48, 52].  
105 This is in line with the finding that social cues, such as colony odor or substrate-borne  
106 vibrations, can be potent Zeitgebers in social insects and can even override photic  
107 entrainment [23, 24].

108         The molecular aspects of plastic timekeeping and its role in driving behavioral  
109 plasticity that gives rise to colony-wide division of labor in ants, and other social insects, are  
110 largely unexplored. Exposing the mechanisms of plastic timekeeping in ants, and how they  
111 connect to behavioral phenotypes, could be essential in our understanding of eusocial  
112 behavior and regulation of colony functioning. A first step in this direction has been made by  
113 Rodrigues-Zas and colleagues, who investigated circadian gene expression in honeybee  
114 forager and nurse brains through a time-course microarray study [16]. However, this study  
115 identified only 4% of all protein coding genes as rhythmic, which seems almost certainly a  
116 vast under-representation considering the abundance of clock-controlled genes that have been  
117 found in other organisms [53-59]. No other genome-wide reports that assess daily rhythms in  
118 gene expression seem to exist for Hymenoptera despite the availability of newer high-  
119 throughput sequencing techniques and improved rhythm detection software [60, 61]. As such,  
120 a major knowledge gap regarding the inner workings of social insect clocks, and especially

121 those of ants, remain. This greatly limits our ability to investigate how biological clocks  
122 could be interacting with social cues to produce functionally distinctive behavioral castes  
123 with their own characteristic chronotypes.

124 Our current study aims to address this knowledge gap by investigating rhythmic gene  
125 expression, throughout a 24h-day, in brains of *Camponotus floridanus* nurse and forager ants.  
126 The Florida carpenter ant, *C. floridanus*, produces large colonies with several thousand  
127 workers, organized in both behavioral and morphological castes. This species is considered  
128 an urban pest [62] and is frequently used in a wide variety of social insect studies (e.g., [63-  
129 72]). To collect forager and nurse ants of *C. floridanus*, we conducted a time-course  
130 experiment in a complex, large colony setup that allowed us to quantify circadian foraging  
131 behavior of the colony and identify individuals based on their behavioral caste. We  
132 subsequently used the brains of collected foragers and nurses for RNASeq to fulfill three  
133 primary objectives: (1) to investigate the extent of rhythmic gene expression for both castes,  
134 (2) to characterize the similarities and differences in their daily transcriptomes, and (3) to  
135 identify putative mechanisms that could allow nurse ants to possess a functional timekeeping  
136 machinery despite no apparent circadian rhythms in daily activity. We found that nurse brains  
137 harbored a reduced number of circadian genes as compared to foragers. Yet, we discovered  
138 that several genes with robust circadian expression in forager brains were not entirely  
139 arrhythmic in nurses. Rather, these genes oscillated with 12-hour and 8-hour periodicities  
140 (the core clock gene *Period* being one of them). We discuss the possibility that such plasticity  
141 in clock and clock-controlled gene expression could facilitate swift nurse to forager  
142 transitions and vice-versa. Furthermore, we used functional enrichments of gene ontology  
143 annotations to identify biological processes that are seemingly under clock-control in *C.*  
144 *floridanus* brains, and highlight the ones enriched for genes that cycled at different  
145 periodicities in the two ant castes. Additionally, we report on genes that were expressed at

146 vastly different levels in the brains of the two ant castes, throughout the day. The protein  
147 products of several of these differentially expressed genes have been discovered in the  
148 trophallactic fluid of *C. floridanus* [69, 73]. As such, we discuss the possibility that division  
149 of labor and the regulation of behavioral chronotypes in ant societies is trophallaxis-  
150 mediated.

151

## 152 **Results and Discussion**

### 153 **Daily rhythms in colony behavior of *Camponotus floridanus***

154 *Camponotus floridanus* is known to be largely nocturnal both in nature (personal field  
155 observations, [62]) and in the lab [67, 68]. Despite this knowledge, we first had to entrain and  
156 quantify the colony-level behavioral rhythms of *C. floridanus* to be able to reliably  
157 investigate the daily gene expression underlying their seemingly clock-regulated behavioral  
158 activity. Therefore, we recorded extranidal visits of a large *C. floridanus* colony, housed in a  
159 darkened nest, that we attached to a foraging arena subjected to a 12h:12h LD cycle (see  
160 Methods section for more details). Subsequently, we counted the number of foraging ants  
161 throughout the day that were actively feeding or present on the feeding stage (Fig. 1, “FS” or  
162 feeding activity) as well as in the remainder of the foraging arena (Fig. 1, “FA” or general  
163 foraging activity). We defined the colony’s total foraging activity (Fig. 1, “Total activity”) as  
164 the sum of FS and FA at any given time. The first signs of initial colony entrainment were  
165 visible through the early establishment of a day-night rhythm in FA (Fig. 1, Day 1-5). In the  
166 following 3 days, we performed mark-and-recapture to identify ants of the foraging caste.  
167 During this time the FA rhythm was somewhat less pronounced but managed to stay intact  
168 (Fig. 1, Day 6-8). From Day 9 onwards, both FS and FA showed pronounced day-night  
169 rhythms that persisted during and beyond the sampling day (Fig. 1, Day 9-15). These day-  
170 night rhythms followed a consistent pattern with increased foraging activity during the night-



171 time as compared to the daytime, similar to previously reported locomotory rhythms of  
 172 isolated *C. floridanus* ants [68]. Thus, based on extranidal activity of the foraging caste, the  
 173 colony established robust nocturnal activity rhythms as it would in nature by entraining to the  
 174 light Zeitgeber we provided.  
 175

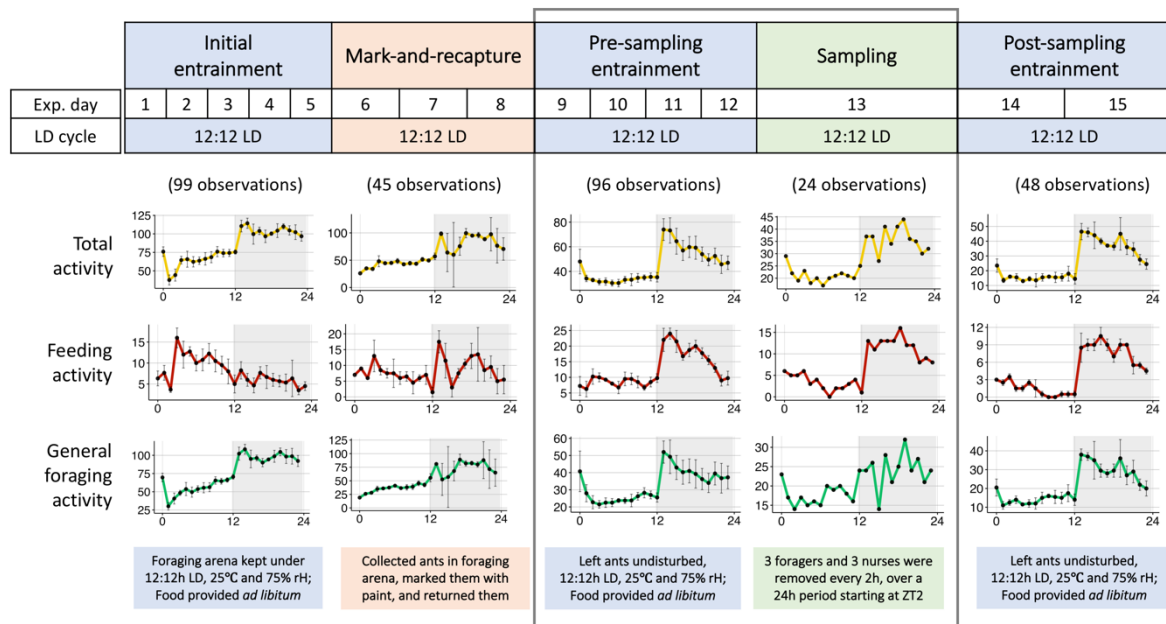

176  
 177 **Figure 1. Daily rhythms in colony activity.** The top panel shows the experimental timeline  
 178 and the bottom graphs show the mean ( $\pm$ SE) daily extranidal activity of the ant colony during  
 179 each phase of the experiment. During the entire experiment, the foraging arena was kept at  
 180 25°C, 70% rH and under oscillating 12h:12h light-dark (LD) cycles. Undisturbed phases  
 181 under light-dark cycles are shown in blue, while experimental phases of disturbance are  
 182 shown in orange (mark-and-recapture of foragers) and green (sampling of ants for RNASeq).  
 183 For each plot, colored lines connecting the dots represent average activity while black bars  
 184 represent one standard error around the mean. The y-axis represents number of ants and the  
 185 x-axis represents Zeitgeber Time (ZT) during the 12h:12h LD cycle. The shaded part of the  
 186 plots represents the dark phase (ZT12-24). The number of ants actively feeding or present on  
 187 the feeding stage is plotted as the feeding activity (FS). The general foraging activity (FA) is

188 the number of ants present in the foraging arena but not on the feeding stage. The total  
189 activity is the sum of FA and FS, representing the total extranidal activity of the colony at a  
190 given time. The number of observations used to calculate the mean ( $\pm$  SE) activity for each  
191 phase are shown in parenthesis at the top of the plots. Missing data points during ‘Initial  
192 entrainment’ and ‘Mark-and-recapture’ were due to inability to get accurate count of ants  
193 from video frames and a recording failure, respectively.

194

195 To further characterize the behavioral rhythms in the entrained *C. floridanus* colony  
196 and to investigate the potential behavioral effects of the disturbance introduced by the mark-  
197 recapture, we performed wavelet analyses [74] on the foraging data collected during the four-  
198 day period just after mark-recapture and prior to sampling (Fig. 1, Day 9-12). *Camponotus*  
199 *floridanus* ants of the foraging caste showed significant circadian rhythms in FS and FA (Fig.  
200 2A). Average wavelet powers indicated that both FS and FA activity profiles comprised of  
201 significant waveforms with a period length close to 24 hours (Fig 2A). Neither FS nor FA  
202 activity peaked exactly at lights-off (ZT12). Rather, we noticed a sharp increase in both  
203 activities about an hour later ( $\sim$ ZT13) (Fig 1, Day 9-12). After peaking around ZT13-15, both  
204 FS and FA activity continued to decrease throughout the night and reached their daily  
205 minimum shortly after lights were turned on (ZT2-4) (Fig 1, Day 9-12). Central Florida (the  
206 location of colony collection) receives an average of  $12 \pm 1$  (mean  $\pm$  SE) hours of sunlight  
207 per day, and dusk lasts for  $84 (\pm 5)$  minutes after sunset (Additional File 1A, data retrieved  
208 from [www.timeanddate.com](http://www.timeanddate.com)). In our experimental setup, we chose an abrupt light-dark  
209 transition, and hence, did not provide twilight cues. Therefore, the stark increase in extranidal  
210 activity within an hour post lights-off, could be indicating an endogenous dusk-entrainment  
211 in colony foraging activity. Taken together, the colony activity rhythms that we observed for  
212 *C. floridanus* – primarily circadian, and predominantly nocturnal, with a dusk-phase – largely

213 resembled previously reported activity patterns [68]. This indicates that the experimental  
214 setup that we designed allowed us to collect daily gene expression data related to expected  
215 ant daily activity patterns.  
216

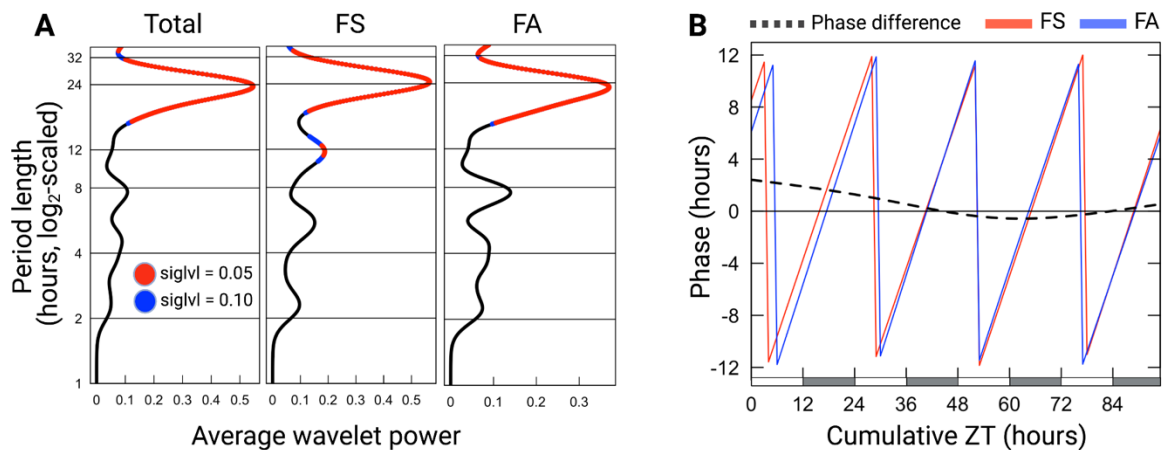

217

218 **Figure 2. Wavelet analysis of feeding and general-foraging activity rhythms. (A)**

219 Dominant periods identified using wavelet decomposition of each activity profile during the  
220 continued entrainment phase (Day 9-12). The x-axis shows the average wavelet power for  
221 different period lengths. The y-axis shows the period length (log<sub>2</sub>-scaled) in hours.

222 Significant period lengths (siglvl < 0.05) are shown in red, and the peak indicates the

223 dominant period having the most power (around 24h for all three activity profiles, and an

224 additional 12h peak observed in feeding bouts); (B) The plot shows the phase (on the y-axis)

225 of feeding bouts (FS) and general foraging activity (FA) during continued entrainment. The

226 dotted line indicates the phase difference of FS over FA during the same time period. Positive

227 phase difference indicates that FS leads FA. The x-axis shows the cumulative hours passed

228 since disturbance due to mark-and-recapture (Cumulative ZT).

229

230 In addition to the dominant circadian rhythm, we detected a significant circa-12h

231 rhythm in FS (Fig. 2A). Inspection of FS power-spectra over the four days of continued-

232 entrainment revealed that, while the circadian rhythm was sustained throughout, the 12h  
233 rhythm was only significantly present during the first 36 hours post disturbance. Within this  
234 36h time-period, integration of the 12h and 24h FS waveform improved fit (Additional File  
235 1B). A possible explanation for the presence of this short-lived 12h activity rhythm could be  
236 that it played a role in catching up with feeding needs of the colony in the initial hours after  
237 disturbance. The removal of foragers during mark-recapture most likely desynchronized the  
238 colony's daily feeding pattern and might explain the lack of a clear circadian activity in FS  
239 and a diminished overall 24h foraging pattern during the mark-recapture period (Fig 1; Day  
240 6-8). As such, we enquired if the circa-12h rhythm in FS could be important to re-establish a  
241 rhythmic colony feeding behavior that is synchronous to the colony's general foraging  
242 activity. To this end, we calculated the phase difference of the 24h-wavelets for FS-over-FA  
243 throughout the four days post mark-recapture (Fig. 2B). At the start of pre-sampling  
244 entrainment (i.e., right after disturbance by mark-recapture), FS was found to lead FA by  
245 more than two hours. Approximately 36 hours into the pre-sampling entrainment period, the  
246 phase difference reduced to zero; 24h-rhythms in FS and FA aligned. Subsequently, the phase  
247 difference between FS and FA remained close to zero (Fig. 2B). This data suggests that,  
248 indeed, after three consecutive nights of disrupted feeding, the colony attempted to get back  
249 on track through a short initial phase shift between FS and FA. Once synchrony between the  
250 phases of the two activities was restored, it was maintained. The intermittent 12h feeding  
251 peaks observed during the first 36h after mark-recapture (Additional File 1B) likely  
252 contributed to restoring this synchrony.

253

## 254 **General patterns of gene expression in *C. floridanus* brain tissue**

255         After twelve days of LD entrainment, we collected three *C. floridanus* foragers and  
256 nurses from the colony every 2 hours, over a 24-hour period (Fig. 1, Day 13). Individuals that

257 were collected in the foraging arena and paint-marked as part of our mark-recapture efforts  
258 were collected as foragers. Unmarked individuals that interacted with the brood inside the  
259 dark nest chambers were collected as nurses. We subsequently used RNA-Seq to obtain the  
260 transcriptome profiles of forager and nurse brain tissue. Of the 13,808 protein coding genes  
261 annotated in the *C. floridanus* genome [70], 8% were not expressed (i.e., FPKM = 0) in any  
262 of the samples collected (Additional File 2, sheet 1). These 1130 non-expressed genes were  
263 enriched in multiple biological processes: DNA integration, DNA replication, telomere  
264 maintenance, proteolysis and apoptotic process, and several molecular functions including  
265 hormone activity (Additional File 2, sheet 2). More than half of all genes annotated to be  
266 involved in nucleotide binding (56% of 27 genes), DNA integration (55% of 86), and those  
267 located in the extracellular matrix (53% of 38) did not exhibit any expression in *C. floridanus*  
268 brains.

269 Furthermore, 19% of the *C. floridanus* genes (2640 genes) were only lowly expressed  
270 in forager and nurse brains (i.e.,  $0 < \text{FPKM} \leq 1$ ) throughout the day (Additional File 2, sheet  
271 1). The majority of genes involved in olfactory and gustatory functions in *C. floridanus* were  
272 among these lowly expressed genes (93% of 363 genes involved in sensory perception of  
273 smell and 73% of 26 genes involved in sensory perception of taste) (Additional File 2, sheet  
274 2). Notably, majority of the genes involved in hormone activity (69% of 16),  
275 metalloproteinase activity (86% of 110), and nucleotide binding (85% of 27) were found to be  
276 enriched among the genes that showed either no or low expression (Additional File 2, sheet  
277 2). The clear overrepresentation of certain gene functions among genes that were either lowly  
278 or not expressed necessitated the use of a reduced background gene set for subsequent  
279 enrichment analyses that consists of only those genes that were actually expressed. This, to  
280 avoid obtaining gene function enrichments that merely reflect brain tissue specific gene  
281 expression. We classified genes to be expressed in *C. floridanus* brains if mRNA levels were

282 greater than 1 FPKM for at least one time point, for either behavioral caste, during the 24h  
283 sampling period.

284 We found 71% (i.e., 9843 genes in foragers and 9872 genes in nurses, Additional File  
285 2, sheet 3) of all protein coding genes to be expressed in ant brains. Of these genes, 166 were  
286 uniquely expressed in the forager brains and 195 in nurses. One *odorant receptor 4-like*, two  
287 *odorant receptor 13a-like*, and two other uncharacterized odorant receptor genes were among  
288 those uniquely expressed in forager brains, along with several proteases. In addition to  
289 significant enrichments in olfaction and proteolysis-related biological processes, uniquely  
290 expressed genes in foragers were also enriched in the cellular component nucleosome and  
291 included several histone-related genes (Additional File 2, sheet 4). In comparison, genes  
292 uniquely expressed in nurses were enriched in redox and lipid metabolic processes and  
293 included several putative *cytochrome P450* and *lipase 3-like* genes (Additional File 2, sheet  
294 4). This is in line with the canonical behavioral and physiological differences that  
295 characterize foragers and nurses in a social insect colony. A fine-tuned olfactory and  
296 gustatory repertoire in foragers is essential for trail-following and other general foraging  
297 tasks. In contrast, metabolic processes have been previously found to be upregulated in  
298 intranidal nurse workers that are usually tasked with larval feeding and brood care [75]. This  
299 indicates that the expression data that we obtained is likely a good representation of the gene  
300 expression profiles that are characteristic for both castes.

301

### 302 **Circadian rhythms in gene expression**

303 We used the non-parametric algorithm empirical JTK Cycle (eJTK) [76, 77] to detect  
304 circadian gene expression patterns in forager and nurse ant brains. Of the 10,038 genes  
305 expressed in *C. floridanus* brains, 42% (i.e., 4242 genes) had significant circadian expression  
306 patterns in either foragers or nurses (Additional File 3, sheet 1 and 2). The number of putative

307 circadian genes in foragers was almost three times higher (i.e., 3569 genes; Fig 3A and B,  
308 indicated with “for-24h”) as compared to nurses (i.e., 1367 genes; Fig 3A and C, indicated  
309 with “nur-24h”). Only 16% of all identified circadian genes cycled in both behavioral castes  
310 with a 24h rhythm (i.e., 694 genes; Fig 3A and D, indicated with “for-24h-nur-24h”), which  
311 represents half of all the circadian genes that we identified in nurses. The reduced number of  
312 circadian genes in nurses is consistent with the previous time-course microarray study done  
313 in honeybees (541 probes in forager bees and 160 probes in nurse bees were found to be  
314 circadian) [16]. This suggests that a reduced circadian control at the level of gene expression  
315 in “around-the-clock” active nurses as compared to rhythmically active foragers likely  
316 persists across social Hymenoptera that display division of labor.

317         After identifying putative 24h cycling genes in the two behavioral groups, we asked if  
318 they contained functional annotations with coordinated temporal peak activity (i.e., are  
319 certain biological functions “day-peaking” or “night-peaking”) and if such a temporal  
320 division of clock-controlled processes can be found in both foragers and nurses. To answer  
321 these questions, we used an agglomerative hierarchical clustering framework to group the  
322 circadian genes in foragers and nurses into four gene clusters (Additional File 3, sheet 3 and  
323 4). We followed this analysis by identifying significantly enriched gene ontology (GO) terms  
324 for each identified gene cluster.

325

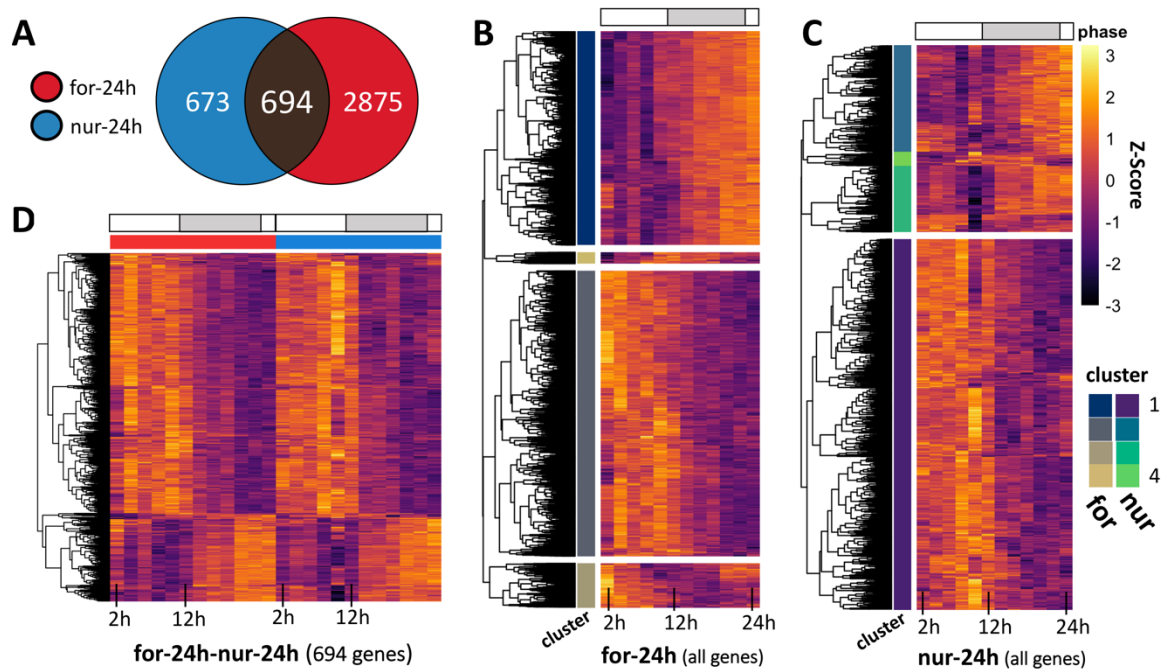

326

327 **Figure 3. Circadian rhythms of gene expression in the ant brain** (A) Venn-diagram  
328 showing the number of genes significantly oscillating every 24h in forager (for-24h) and  
329 nurse (nur-24h) brains. The heatmaps show the daily expression (z-score) patterns of all  
330 identified 24h-oscillating genes in (B) foragers (for-24h), (C) nurses (nur-24h), and (D) both  
331 foragers and nurses (for-24h-nur-24h). Each row represents a single gene and each column  
332 represents the Zeitgeber Time (ZT) at which the sample was collected, shown in  
333 chronological order from left to right (from ZT2 to ZT24, every 2h). The grey bar above the  
334 heatmaps runs from ZT12 to ZT24 and indicates the time during the light-dark cycle in which  
335 lights were off. Both for-24h and nur-24h genes were hierarchically clustered into four  
336 clusters. The cluster identity of each gene is indicated in the cluster annotation column.

337

338 The choice of four clusters was aimed to demarcate, if possible, potential day-, night-,  
339 dawn-, and dusk-peaking genes. Using this method, we identified that more than half of all  
340 circadian genes in foragers showed a peak activity during early-to-mid daytime (1916 genes,  
341 Fig. 3B, for-24h\_Cluster2). The majority of the remaining genes showed peak expression  
342 activity around late night-time (1417 genes, Fig. 3B, for-24h\_Cluster1). Additionally, one of



343 the two smaller clusters of genes that cycled with a 24h rhythm in foragers (74 genes, Fig.  
344 3B, for-24h\_Cluster4) appeared to peak at dusk with an acrophase around ZT12-14. Among  
345 these dusk-peaking genes we identified the putative insect melatonin receptor *trapped in*  
346 *endoderm* (*tre1*; *MTNR1a* in mammals), which has been reported to be central to the  
347 dusk/dawn entrainment pathway in humans (Table 1) [78-80]. The genes in nurse brains that  
348 showed 24h rhythms also primarily clustered into two groups – day-peaking (909 genes, Fig  
349 3C, nur-24h\_Cluster1) and night-peaking genes (261 genes, Fig 3C, nur-24h\_Cluster2) –  
350 with only a few genes in the remaining two clusters (Cluster 3, 162 genes; Cluster 4, 35  
351 genes).

352         Despite the relatively smaller number of day-peaking and night-peaking circadian  
353 genes in nurses, we found functional enrichments comparable to those found in foragers. The  
354 night-peaking gene clusters in foragers and nurses were both enriched in genes with the  
355 annotated GO terms: regulation of transcription (DNA-templated), signal transduction and  
356 protein phosphorylation (Additional File 3, sheet 5). This indicates that a significant number  
357 of night-peaking circadian genes in nurse and forager brains seem to be involved in cell-cell  
358 communication, gene expression, and protein modification. The day-peaking circadian gene  
359 clusters in both behavioral groups were enriched for genes involved in metabolism  
360 (glycosylphosphatidylinositol (GPI) anchor biosynthesis) (Additional File 3, sheet 5). In  
361 addition, the circadian gene clusters in foragers were enriched for multiple other biological  
362 processes that were not found to be enriched in nurses. The day-peaking genes in foragers  
363 were enriched for GO terms that concerned response to stress, as well as tRNA, mRNA and  
364 translational processes, and terms involved in post protein processing such as folding and  
365 transport (Additional File 3, sheet 5). Night-peaking genes in foragers were additionally  
366 enriched in terms such as regulation of transcription by RNA polymerase II, multicellular  
367 organism development, protein homooligomerization, microtubule-based movement, G

368 protein-coupled receptor signaling pathway, and ion transmembrane transport (Additional  
369 File 3, sheet 5). This temporal segregation of clock-controlled processes in foragers appears  
370 to be in line with findings from previous studies done on the fungus *Neurospora crassa*,  
371 mammals and flies [55, 57, 81]. However, while the daily transcriptome of rhythmic foragers  
372 revealed the expected temporal separation, nurse gene expression showed a much more  
373 limited temporal organization. This provides further evidence for a reduced circadian control  
374 in “around-the-clock” active nurses as compared to rhythmically active foragers.

375         The question that remains is if the shared functional enrichments among the 24h  
376 rhythmic genes in both ant castes encompass the same exact genes or if they are different but  
377 with similar functions. To answer this question, we analyzed the functional annotations of the  
378 694 circadian genes that were shared between foragers and nurses. Hierarchical clustering  
379 revealed that these genes predominantly peaked during the daytime (Fig. 3D) and that the  
380 shared day-peaking genes were significantly enriched in the functional annotation GPI anchor  
381 biosynthesis (genes *Pig-b*, *Pig-c*, *Pig-g*, *Pig-m*, and *Mppe*) (Additional File 3, sheet 5).  
382 However, the relatively smaller set of shared night-peaking circadian genes was not enriched  
383 in any functional annotations. This suggests that the night-peaking activity of regulation of  
384 transcription (DNA-templated), signal transduction and protein phosphorylation are mostly  
385 due to different sets of circadian genes in foragers and nurses, but with similar functions. In  
386 contrast, GPI anchor biosynthesis activity appears to be driven by the same day-peaking  
387 circadian genes in both ant castes.

388         The molecular underpinnings of timekeeping in nurse ants, and other animals with  
389 “around-the-clock” activity, is still elusive [14, 16, 82]. To find candidate genes presumably  
390 involved in daily timekeeping in *C. floridanus* nurses, we queried the circadian genes that  
391 they shared with foragers for known components of the insect clock (Additional File 4). The  
392 shared day-peaking gene cluster contained one known clock output gene (i.e., *Lark*) and two

393 genes known to modulate the circadian clock – *Casein kinase 2 alpha (Ck2a)* and the light-  
394 dependent *Rhodopsin (Rh6)*; orthologous to mammalian *Opn4*) (Table 1, Fig. 4). Along with  
395 other members of the opsin gene family, the *Rh6* gene in *Drosophila* has been shown to also  
396 have light-independent functions in thermosensation (in larvae) and hearing (in adults) [83,  
397 84]. The auditory role of opsins, likely mediated by mechanotransduction [85], could be  
398 especially relevant for circadian entrainment in social insects. Ants and bees are known to use  
399 vibroacoustic means such as “drumming” behavior (i.e., vibrations produced by tapping the  
400 nest substrate with their head and gaster) to communicate within dark nest chambers [86-89].  
401 Moreover, there is recent evidence that substrate-borne vibrations are potent social Zeitgebers  
402 capable of entraining the circadian clock of newly emerged honey bees housed in the dark  
403 [24]. These substrate-borne vibrations could potentially play a similar role in the social  
404 entrainment of nurse ants through the light-independent involvement of a rhodopsin-mediated  
405 mechanosensory pathway [85], while extranidal foragers might also make use of its light-  
406 dependent functions.

407 In addition to *Rh6*, the kinase *Ck2a* showed robust 24h rhythms and a near-perfect  
408 alignment in gene expression between the behavioral groups (Additional File 3, Fig. 4). *Ck2a*  
409 encodes the catalytic subunit of the circadian protein, Casein Kinase 2 (CK2). In *Drosophila*,  
410 CK2 appears to regulate rhythmic behavior by phosphorylating the core clock proteins  
411 PERIOD (PER) and TIMELESS (TIM) [90-93]. This CK2-mediated phosphorylation is  
412 perceived as a rate-limiting step in the circadian clock, important for a functional 24h  
413 transcription-translation feedback loop [93]. The central role of CK2 in regulating the  
414 endogenous clock in other organisms suggests a potential role of *Ck2a* in maintaining a  
415 functional 24h oscillator in both, “around-the-clock” active nurses and rhythmically active  
416 foragers. However, other homologs of genes encoding core clock proteins, such as PER, were

417 not present among the circadian genes that were shared between foragers and nurses (Table 1,  
418 Additional File 3).

419

420 Table 1. **Clock components of *Camponotus floridanus* and their gene expression patterns**

421 **in forager and nurse brains.** The table below lists the *C. floridanus* homologs of several

422 *Drosophila* core-clock, clock-modulator and clock-output genes. The periodicity (tau) of

423 rhythmic gene expression in the brain, if any, is indicated for both foragers and nurses. The

424 one-to-one ortholog of the identified *C. floridanus* gene in mammals and honeybees is also

425 provided. A dash in the periodicity column indicates that no significant daily rhythms were

426 detected for the *C. floridanus* gene, whereas a dash in the ortholog columns indicates that no

427 one-to-one orthologs of the *C. floridanus* gene was detected. The genes that show differential

428 rhythmicity, oscillating at two distinct periodicities, in the two ant castes are shown in bold.

| Homologs of key insect clock components present in <i>Camponotus floridanus</i> ( <i>Cflo</i> ) |                     |                   | Periodicity (tau) of gene expression |           | One-to-one ortholog of the <i>Cflo</i> gene in |                         |
|-------------------------------------------------------------------------------------------------|---------------------|-------------------|--------------------------------------|-----------|------------------------------------------------|-------------------------|
| <i>Drosophila</i> gene                                                                          | <i>Cflo</i> homolog | Function          | Forager                              | Nurse     | mice or humans                                 | honeybees               |
| <i>Clock</i>                                                                                    | LOC105257275        | core-clock        | 12h                                  | -         | <i>Npas2</i>                                   | <i>Clock</i>            |
| <b><i>Period</i></b>                                                                            | <b>LOC105256454</b> | <b>core-clock</b> | <b>24h</b>                           | <b>8h</b> | -                                              | <b><i>Per</i></b>       |
| <i>Vrille</i>                                                                                   | LOC105252510        | core-clock        | 8h                                   | -         | -                                              | <i>Ataxin-2</i> homolog |
| <i>Double-time</i>                                                                              | LOC105255207        | modulator         | 24h                                  | -         | <i>Ckl1d/e</i>                                 | <i>Ckl1</i>             |
| <i>Casein kinase 2 alpha</i>                                                                    | LOC105256631        | modulator         | 24h                                  | 24h       | <i>Ck2a</i>                                    | <i>Ck2a</i>             |
| <b><i>Shaggy</i></b>                                                                            | <b>LOC105258655</b> | <b>modulator</b>  | <b>24h</b>                           | <b>8h</b> | <b><i>Gsk3b</i></b>                            | <b><i>Sgg</i></b>       |
| <i>Nemo</i>                                                                                     | LOC105248529        | modulator         | 24h                                  | -         | <i>Nlk</i>                                     | <i>Nlk2</i>             |
| <b><i>Protein phosphatase 1b</i></b>                                                            | <b>LOC105251553</b> | <b>modulator</b>  | <b>24h</b>                           | <b>8h</b> | <b><i>Pp1b</i></b>                             | <b><i>Pp1b</i></b>      |
| <b><i>Pp1</i></b>                                                                               | <b>LOC105250191</b> | <b>modulator</b>  | <b>24h</b>                           | <b>8h</b> | -                                              | -                       |
| <i>Rhodopsin</i>                                                                                | LOC105252466        | modulator         | 24h                                  | 24h       | <i>Opn4</i>                                    | <i>Lop1</i>             |
| <i>mAchR</i>                                                                                    | LOC105253861        | output            | 24h                                  | -         | -                                              | <i>mAchR</i>            |
| <b><i>DopEcR</i></b>                                                                            | <b>LOC105257836</b> | <b>output</b>     | <b>24h</b>                           | <b>8h</b> | <b><i>Gpr52</i></b>                            | <b><i>DopEcR</i></b>    |
| <i>Pigment dispersing factor</i>                                                                | LOC105256952        | output            | 24h                                  | -         | -                                              | <i>Pdf</i>              |
| <i>Pdf receptor</i>                                                                             | LOC105252917        | output            | 24h                                  | -         | -                                              | <i>Pdfr</i>             |
| <i>Protein kinase A</i>                                                                         | LOC105249574        | output            | 24h                                  | -         | <i>Prkaca/b</i>                                | <i>Pka</i>              |
| <i>Lark</i>                                                                                     | LOC105259208        | output            | 24h                                  | 24h       | <i>Rbm4</i>                                    | <i>Lark</i>             |
| <b><i>Protein kinase C</i></b>                                                                  | <b>LOC105255087</b> | <b>output</b>     | <b>24h</b>                           | <b>8h</b> | <b><i>Prkci</i></b>                            | <b><i>Pkc</i></b>       |
| <i>Trapped in endoderm 1</i>                                                                    | LOC105250997        | output            | 24h                                  | -         | <i>MT1</i>                                     | <i>Tre1</i>             |
| <i>Slowpoke</i>                                                                                 | LOC105258647        | output            | 24h                                  | -         | <i>Slo</i>                                     | <i>Kenmal</i>           |

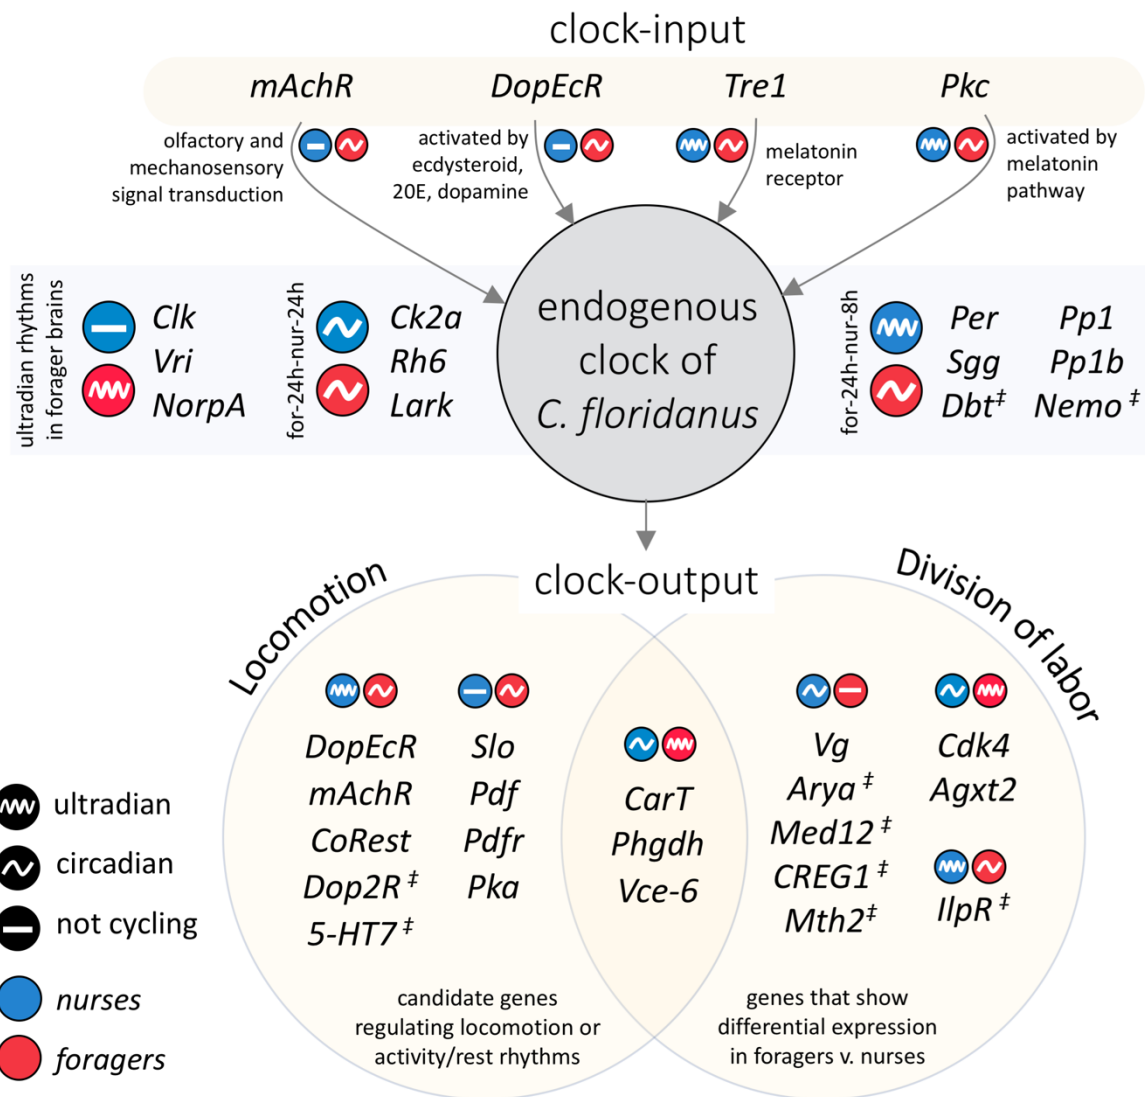

430

431 Figure 4. **Potential links between chronobiological plasticity and behavioral division of**

432 **labor in *C. floridanus*.** The infographic shows differences in rhythmic expression in forager

433 and nurse brains for several genes involved in entrainment of the endogenous clock (clock-

434 input), proper functioning of the endogenous clock, and the clock-controlled pathways

435 (clock-output) that likely regulate locomotion and division of labor in ants. The symbol “‡”

436 indicates that gene expression for that gene shows a trend of rhythmic expression in one of

437 the ant castes (Additional File 5) but was not significant ( $p \geq 0.05$ ). Ultradian rhythms

438 include both 8h and 12h oscillations. The following genes has been abbreviated in the figure

439 but not in the text: *Venom-carboxylesterase-6* (*Vce-6*), *Arylphorin-subunit-alpha* (*Arya*).

440

## 441 **Ultradian rhythms in gene expression**

442 “Ultradian rhythms” in gene expression refer to significantly oscillating expression  
443 patterns around the second and third harmonic of circadian rhythms (i.e., genes cycling with  
444 periodicities of 12 hours and 8 hours, respectively). Such rhythms can be found in a wide  
445 range of species [94-100], and examples in which organisms switch from circadian to  
446 ultradian gene expression due to changes in environmental circumstances have been reported  
447 [101]. When we visually inspected the expression of several genes that exhibited circadian  
448 rhythmicity in foragers but not in nurses, we noticed that the expression of multiple such  
449 genes in nurses was relatively dampened but seemed to oscillate at a frequency higher than  
450 24 hours. As such, we used eJTK to detect if any genes were expressed with significant  
451 ultradian rhythms (Additional File 6). We identified a comparable number of genes that  
452 cycled with a 12h period in forager and nurse brains (i.e., 148 and 193, respectively), and 2  
453 genes that showed 12h period in both castes (Fig. 5A). In foragers, the core-clock gene *Clock*  
454 (*Clk*) was present among the 12h oscillating genes (Table 1, Fig. 4). However, we did not  
455 detect circadian or ultradian rhythmicity in *Clk* expression in nurses (Table 1). As for genes  
456 that oscillated with a robust 8h rhythm, we discovered 229 such genes in forager brains and  
457 about twice as many (550 genes) in nurses. Only three genes showed an 8h cycling pattern in  
458 both behavioral castes (Fig 5A).

459

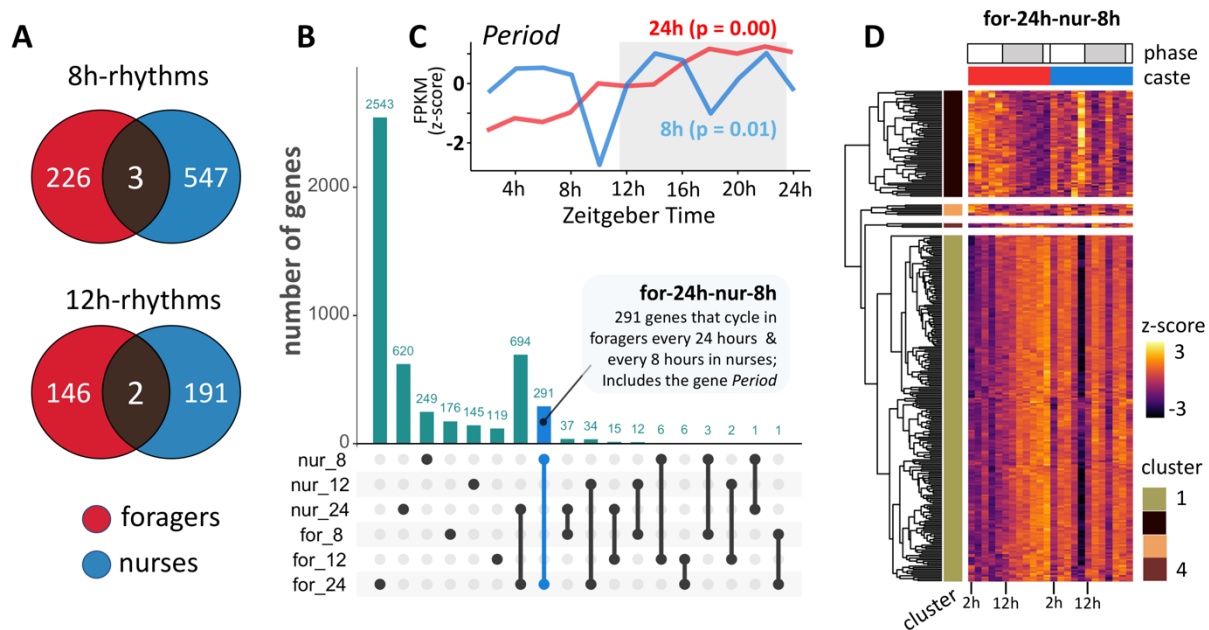

460

461 **Figure 5. Ultradian rhythms and caste-associated differential rhythmicity in gene**

462 **expression.** (A) Venn-diagrams showing the number of genes with significant ultradian

463 expression in the ant brain, oscillating every 8-hour (8h-rhythms) and 12-hour (12h-rhythms);

464 (B) Upset plot showing the number of genes uniquely expressed in, and shared between,

465 circadian (24h) and ultradian (8h and 12h) gene sets. Each bar represents a unique

466 intersection between the six circadian and ultradian genesets (e.g., for\_24: 24h-oscillating

467 genes in foragers, nur-12: 12h-oscillating genes in nurses, etc.). A gene is binned only once,

468 and as such, belongs to only one intersection. Dark circles indicate the gene sets that are part

469 of a particular intersection. For example, the first circle indicates that there are 2543 genes

470 that are uniquely cycling in foragers with a 24h period (for\_24). Similarly, the blue bar

471 indicates that there are 291 genes that have a significantly circadian expression in foragers

472 but cycle every 8-hours in nurses (for-24h-nur-8h); (C) Caste-associated differential

473 rhythmicity in the expression of the core clock gene *Period* is shown. The expression of *Per*

474 cycles every 24-hours in forager brains (red) and every 8-hours in nurses (blue); p-values

475 obtained from eJTK are provided in parenthesis. The Zeitgeber Time is indicated on the x-

476 axis, while the y-axis shows the normalized (Z-score) gene expression. The dark phase of the



477 12h:12h light-dark cycle is represented in grey (dark phase begins at ZT12); **(D)** Heatmap  
478 showing the daily expression of all genes in the for-24h-nur-8h geneset, for nurses and  
479 foragers. Caste identity is indicated above the heatmap as a column annotation (red-foragers  
480 and blue-nurses). The for-24h-nur-8h geneset was clustered into four groups, and the cluster  
481 identity of each gene is indicated as row annotations (“cluster”). The majority of 8h-cycling  
482 genes in nurses, including the *Per* gene, belong to Cluster 1 and show a night-time peak in  
483 forager heads.

484

485         Having identified ultradian rhythms in gene expression, we asked if genes that  
486 oscillated in a circadian manner in forager brains, but not in nurses, were cycling in an  
487 ultradian manner in nurses. Indeed, we found that 325 (out of 2875) genes that cycled every  
488 24h in foragers were not arrhythmic in nurses but differentially rhythmic genes (DRGs) that  
489 showed robust 8h (291 genes) or 12h (34 genes) rhythms (“for-24h-nur-8h” and “for-24h-  
490 nur-12h”, respectively; Fig. 5B). Remarkably, several components of the insect clock were  
491 among the 291 DRGs that cycled every 24h in foragers and every 8 hours in nurses: *Period*  
492 (*Per*), *Shaggy* (*Sgg*; *Gsk3b* in mammals), *Protein phosphatase 1b* (*Pp1b*), and *Protein*  
493 *phosphatase 1 at 13C* (*Pp1-13c* or *Pp1*) (Fig. 4, Table 1). This suggests that gene expression  
494 in nurse ant brains is, perhaps, not as arrhythmic as previously reported [28]. Instead, certain  
495 clock components in nurses seem to be cycling at a different harmonic compared to foragers,  
496 which could be partly facilitating the swift behavioral caste changes between foragers and  
497 nurses that have been observed in other studies [25, 48, 102]. As such, we continued our  
498 investigation into the genes that cycled every 24h in foragers and every 8h in nurses by  
499 asking if these DRGs play putative functional roles in regulating known clock-controlled  
500 processes as well as behavioral plasticity in ants.

501

## 502 **Chronobiological plasticity and behavioral division of labor in ants**

503           In *Drosophila*, the circadian clock regulates daily rhythms in transcription via  
504 rhythmic binding of CLK and RNA Polymerase (Pol) II to the promoters of clock genes  
505 including *Per*, *Doubletime* (*Dbt*; *Ckl* in mammals) and *Shaggy* (*Sgg*, *Gsk3b* in mammals)  
506 [36, 103]. The kinase SGG regulates nuclear accumulation of the PER/TIM repressor  
507 complex [93, 104, 105], whereas DBT regulates its stability [106-108]. In addition to DBT,  
508 several other kinases (e.g., NEMO, CK2, and PKA) [106, 109-111] and a few phosphatases  
509 (e.g., PP1 and PP2a) [112, 113] have been identified as regulators of PER and PER/TIM  
510 stability in *Drosophila*. In our study, the daily changes in the expression of *Sgg*, *Dbt*, *Nemo*,  
511 *Pplb* and *Ppl* mirrored the differentially rhythmic expression patterns of *Per* in the two ant  
512 castes (Fig. 5C, Table 1). Even though the 8h rhythms of *Dbt* (p=0.11) and *Nemo* (p=0.11) in  
513 nurse brains were not statistically significant, their expression patterns showed a strong phase  
514 coherence with *Per* (Additional File 5). Taken together, these findings further suggest that  
515 oscillations of key clock components at the third harmonic of the circadian rhythm in nurse  
516 brains might underlie a differentially regulated, yet functional, TTFL in this caste. Having  
517 core clock components that simply cycle at a different harmonic, versus not showing any  
518 rhythmicity at all, could indeed explain the ability of “around-the-clock” nurses to rapidly  
519 develop forager-like circadian activity, in behavior and gene expression, when their social  
520 context changes [25, 48, 102].

521           In the fruit fly *Drosophila*, the expression of *Per* and several other clock and clock-  
522 controlled genes peak during the night-time [103]. Similar to *Drosophila*, we observed a  
523 night-time peak in *Per* expression for *C. floridanus* foragers, which is also consistent with  
524 previous findings in fire ants and honeybees [14, 102]. Furthermore, hierarchical clustering of  
525 the DRGs that cycled every 24h in foragers and every 8h in nurses revealed that most of these  
526 DRGs clustered with *Per* (i.e., largely in-phase with the expression pattern of *Per* in foragers

527 and nurses) (Fig. 5D, Additional File 7, sheet 1). Therefore, we hypothesized that the DRG-  
528 cluster in nurses that oscillated every 8h with a phase similar to *Period* would be enriched for  
529 some of the same biological processes performed by 24h cycling genes in foragers discussed  
530 above. Indeed, we found that the *Per*-like DRG-cluster was significantly enriched in  
531 functional annotations that we also identified in the night-peaking circadian gene cluster of  
532 foragers; the GO terms: transcriptional regulation (DNA-templated), transcriptional  
533 regulation by RNA Pol II, protein phosphorylation and GPCR signal transduction,  
534 (Additional File 7, sheet 2).

535         Moreover, the *Per*-like DRG cluster contained the muscarinic acetylcholine receptor  
536 gene *mAChR* and the insect dopamine/ecdyseroid receptor *DopEcR*, which have both been  
537 found to be clock-controlled in *Drosophila* [55, 114, 115]. The *mAChR* gene has a putative  
538 role in olfactory and mechanosensory signal transduction [116, 117]. Therefore, its  
539 differential clock-controlled regulation in foragers and nurses could be contributing to caste-  
540 specific behavioral phenotypes (Fig. 4). The same could be true for *DopEcR*, which  
541 modulates insect behavior by responding to dopamine, ecdysone and 20-hydroxyecdysone  
542 [118-121]. In fact, dopamine is a known regulator of foraging activity in ants (reviewed in  
543 [122, 123]) and dopamine signaling has been found to be important in entraining the insect  
544 circadian clock as well as mediating clock-controlled behavioral phenotypes such as  
545 locomotion [124-126]. Moreover, studies in mammals suggest that certain dopaminergic  
546 oscillators are highly tunable and capable of generating ultradian rhythms in locomotor  
547 activity, independent of the circadian clock [127]. As such, our finding that forager and nurse  
548 ants respectively exhibit circadian and ultradian oscillations in the expression of genes that  
549 affect behavioral outputs, suggests that mechanistic links between chronobiological and  
550 behavioral plasticity in ants exist (Fig. 4).

551 It is not clear if the 8h rhythms in ant brain gene expression are endogenously  
552 produced or socially regulated, and what the functional aspects of such rhythms are, if any.  
553 However, the social insect literature does point to one likely role for the ability of nurses to  
554 track 8h periods: brood translocation. Workers of the carpenter ant species *Camponotus mus*  
555 have been observed to show daily rhythms in brood translocation behavior to move their  
556 brood between different temperature conditions. The measured time between the two daily  
557 brood translocations was exactly 8 hours [11, 128, 129]. This suggests that the 24h rhythm in  
558 thermal preference in *C. mus* nurses could be coupled with an 8h oscillator that drives the  
559 observed daily timing of temperature-dependent brood translocation. Brood translocation is  
560 important for larval development, and hence, has implications for colony fitness [12]. As  
561 such, 8h rhythms in behavioral outputs could have important adaptive functions. To begin to  
562 understand the potential roles for ultradian rhythms in the functioning of ant colonies,  
563 behavioral and molecular studies aimed at linking 8h transcriptional rhythms and brood  
564 translocation could provide a good first step.

565

### 566 **Plasticity in circadian entrainment and behavioral output pathways**

567 The blue-light sensitive gene *cryptochrome*, which is essential for flies to entrain to  
568 light-dark cycles, is absent in both mammals and Hymenoptera [14, 130, 131]. As such,  
569 previous studies have suggested that the circadian clock in ants and honeybees likely  
570 resembles that of mammals, at least more so than the *Drosophila* clock does [14, 131].  
571 However, not much is known about the molecular pathways that underlie circadian  
572 entrainment in ants. To assess the possibility of a mammalian-like entrainment pathway in  
573 ants, we queried the *C. floridanus* genome for orthologs of mammalian genes known to be  
574 involved in the circadian entrainment pathway (KEGG pathway: hsa04713). We found that  
575 *C. floridanus* possess one-to-one orthologs for most of the components in a mammalian-like

576 entrainment pathway (Additional File 8), including the melatonin pathway that underlies  
577 dusk/dawn entrainment [78, 80]. Melatonin titers in the heads of adult honeybees show daily  
578 rhythms with crepuscular peaks at dusk and dawn [132]. As such, Hymenopterans might  
579 indeed have a melatonin-based entrainment pathway. Caste-specific differences in melatonin  
580 levels were also found, with lower titers in the heads of young nurse bees compared to older  
581 foraging individuals [132]. Our behavioral experiments indicated that nocturnal *C. floridanus*  
582 foragers are likely dusk-entrained. This suggests that a mammalian-like melatonin pathway  
583 might be involved in the dusk-entrainment of ant clocks as well. Indeed, the *C. floridanus*  
584 genome contains orthologs of both mammalian melatonin receptors – *trapped in endoderm 1*  
585 (*Tre1*; *MT1* in mammals) and *moody* (*MT2* in mammals) (Table 1, Fig. 4). While the gene  
586 expression of *moody* did not oscillate in either caste, *Tre1* expression showed circadian  
587 oscillation in foragers with a peak around dusk. In mammals, the activation of melatonin  
588 receptors at dusk or dawn triggers resetting of the clock through a signaling cascade that  
589 activates the kinase PKC [78]. Even though neither of the melatonin receptors were cycling  
590 in nurse brains, we found that *Pkc* oscillated every 8 hours while it does so every 24 hours in  
591 foragers (Table 1). Therefore, our data suggests that 24h rhythms in foragers could rely on a  
592 dusk entrainment pathway that likely involves melatonin-PKC signaling, while the 8h  
593 oscillatory rhythms in the nurse transcriptome could potentially be the result of an alternate,  
594 yet functional, *Pkc* activation pathway. Under the dark nest conditions in which nurses reside,  
595 this alternate 8h-oscillatory *Pkc* activation could be the main pathway to reset the clock,  
596 while this pathway gets overridden in foragers that experience light-dark cues and, thus,  
597 produce melatonin (Fig. 4).

598         Entrainment to external stimuli is central to the adaptive timing of rhythmic clock-  
599 controlled outputs such as extranidal foraging visits. While foragers receive both light and  
600 social cues, nurses primarily rely on social stimuli, which are likely to be different from those

601 that foragers receive. As argued with regards to the melatonin-PKC signaling pathway, these  
602 entrainment cue differences might explain, at least partially, the differences in the clock-  
603 controlled output in the two ant castes. The differences that we found in clock-controlled  
604 gene expression could be giving rise to the observed presence of robust circadian activity in  
605 foragers and the absence of such rhythms in nurses. One such gene could be the *Foraging*  
606 (*For*) gene, which is known to regulate extranidal foraging activity of insects including ants  
607 [133-135]. Therefore, we hypothesized that the expression of *For* in forager ants would show  
608 rhythmic oscillations that mimic the daily foraging activity of the colony. Visual inspection  
609 of *For* expression patterns indicated a trend in rhythmicity that resembled the expression of  
610 *Period* in both foragers and nurses (Additional File 5). However, our eJTK analyses did not  
611 find any significance for these supposed gene expression trends in forager brains ( $\tau = 24\text{h}$ ,  
612  $p = 0.1$ ). As such, our hypothesis was not confirmed, which could be due to our experimental  
613 and analytical limitations. Alternatively, *For* might simply not be clock-controlled and  
614 rhythmic locomotory activity might be regulated by genes such as *Slowpoke* (*Slo*), a cycling  
615 potassium channel, which functions as a central regulator of rhythmic locomotion activity in  
616 flies [136, 137]. Indeed, *C. floridanus* contains a homolog of *Slo*, which appeared to be  
617 cycling every 24h in foragers (Fig. 4, Additional File 3, sheet 1). However, we did not find  
618 significant gene expression oscillations in nurses, though an 8h rhythmicity trend appeared to  
619 be there ( $\tau = 8\text{h}$ ,  $p = 0.17$ ) (Additional File 5).

620 In addition to genes involved in locomotion and foraging, clock-controlled genes  
621 coding for neuropeptides and their receptors could be involved in regulating differentially  
622 rhythmic activity patterns in foragers and nurses. In flies, rhythmic activity patterns in total  
623 darkness have been related to the signaling pathway mediated by the neuropeptide Pigment  
624 Dispersing Factor (PDF) [36, 138-141]. PDF binds to the PDF receptor (PDFR) and triggers  
625 a signal transduction that increases cAMP levels and activates the protein kinase PKA [111].

626 A deficiency in PKA resulted in loss of fly locomotory rhythms even when *Per* oscillation  
627 was intact [142]. Moreover, PDF plays a central role in circadian timekeeping by mediating  
628 light input to the circadian clock neurons in the brain, coordinating pacemaker interactions  
629 among neurons, regulating the amplitude, period, and phase of circadian oscillations, and  
630 mediating output from the clock to other parts in the central brain [143-151]. Neurons that  
631 express PDF are present in the *C. floridanus* brain as well and could be mediating time-of-  
632 day information to brain regions involved in activity rhythms [68, 152-154]. In line with this,  
633 we found robust circadian rhythms in *Pdf*, *Pdfr* and *Pka* gene expression in the brains of *C.*  
634 *floridanus* foragers (Fig. 4, Table 1). However, nurse ants, which generally reside in dark nest  
635 chambers and demonstrate a lack of circadian rhythms in locomotion, did not exhibit  
636 circadian nor ultradian rhythmicity in *Pdf*, *Pdfr* and *Pka* expression (Fig. 4, Table 1). The  
637 absence of circadian locomotory rhythms in nurse ants could, thus, also be the result of a  
638 non-oscillatory PDF signaling pathway.

639

#### 640 **Clock-control of differentially expressed genes**

641 Past research has identified several genes and pathways that could be underlying behavioral  
642 division of labor [75, 155-159]. However, the extent of clock control over these key elements  
643 has not been explored yet. As such, we identified genes that were differentially expressed  
644 between the two ant castes throughout the day and determined if these differentially  
645 expressed genes (DEGs) showed any circadian or ultradian oscillations. Of the 10,038  
646 expressed genes in the brains of *C. floridanus*, only 81 were significantly differentially  
647 expressed between the two behavioral groups throughout the day (fold change  $\geq 2$ , q-value  $<$   
648 0.05; Additional File 9, sheet 1). Of these DEGs, 34 were significantly higher expressed in  
649 forager brains, and the remaining 47 were higher expressed in nurses (Fig. 6; Additional File  
650 9, sheet 1). The 34 genes that were higher expressed in foragers comprised of several genes

651 with unidentified functions and did not contain any significantly enriched GO terms. In  
652 contrast, the 47 genes that were higher expressed in nurses contained five maltase and five  
653 alpha-amylase genes which resulted in a significant enrichment for the GO terms  
654 carbohydrate metabolic process and catalytic activity (Additional File 9, sheet 2). This  
655 suggests that nurses might be metabolically more active than foragers, which is in line with  
656 previous findings from another ant species [75].  
657



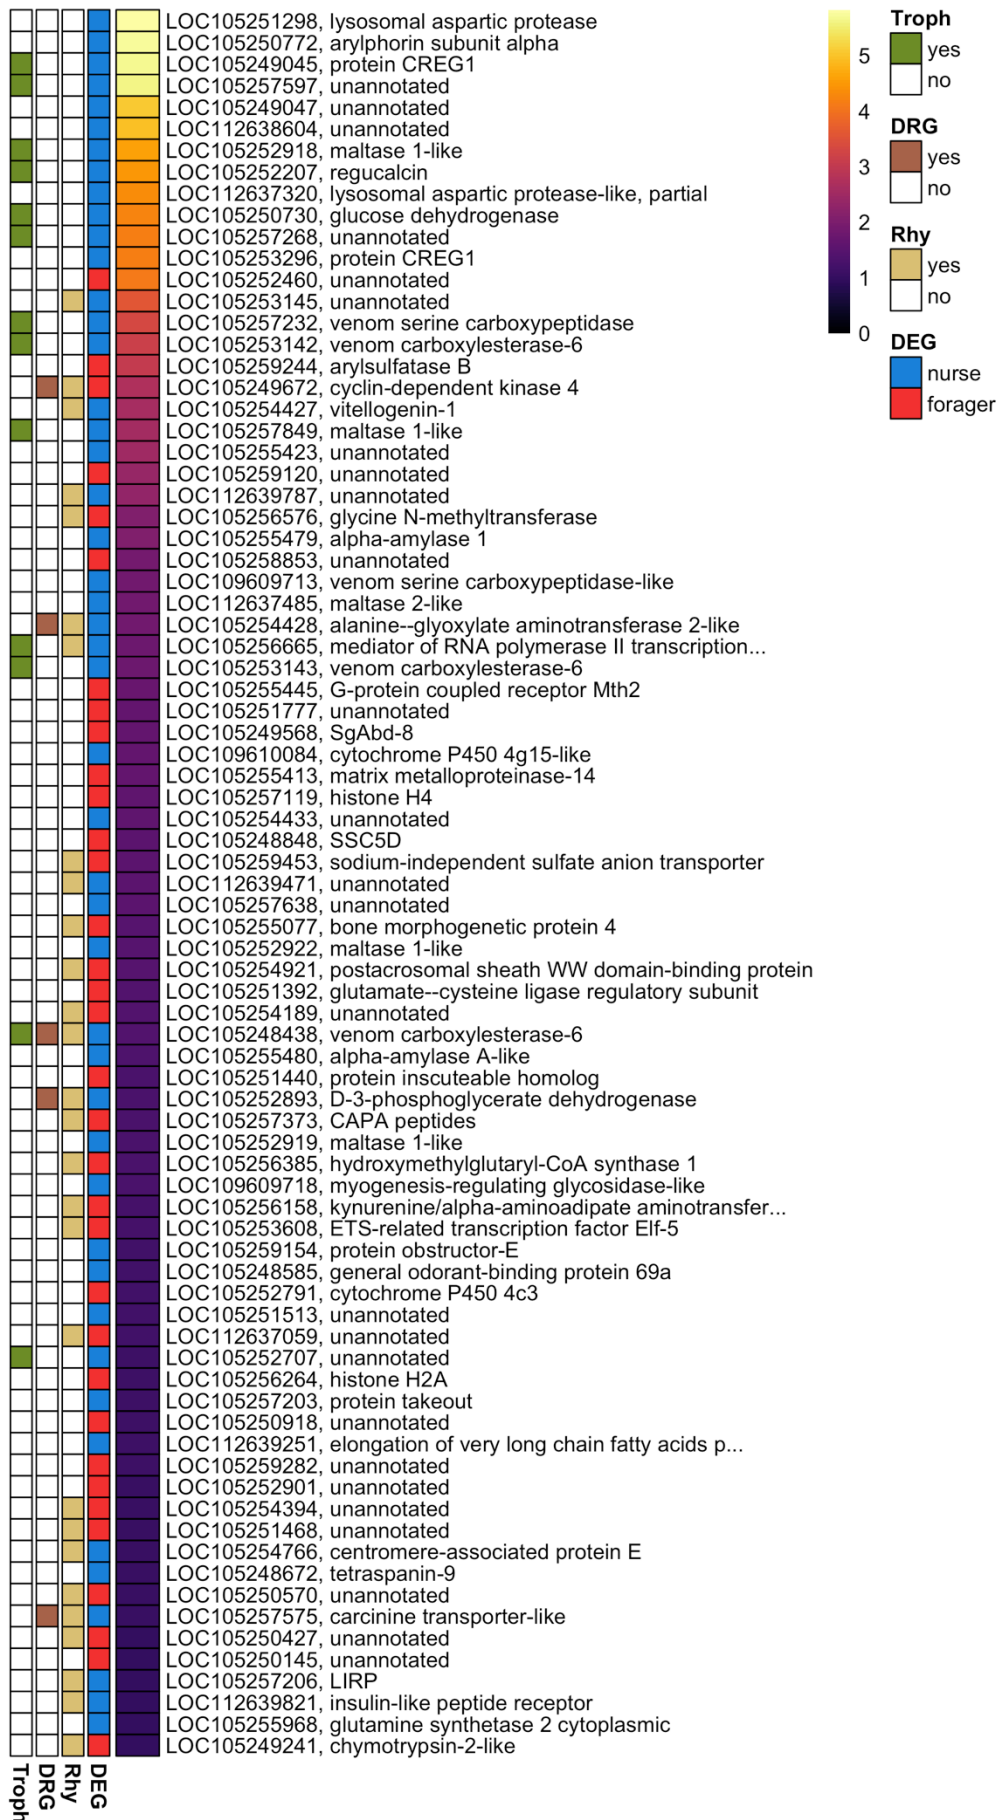

659 **Figure 6. Differentially expressed genes between forager and nurse ant brains.** Heatmap  
660 showing absolute (abs) log<sub>2</sub>-Fold-Change (log<sub>2</sub>FC) values for all 81 DEGs ( $q < 0.05$  and  
661  $\text{abs}(\log_2\text{FC}) \geq 1$ ), ordered from highest to lowest fold-change. The DEG column indicates if  
662 the gene is significantly higher expressed in foragers (red) or nurses (blue). For each DEG,  
663 the *C. floridanus* gene numbers and their blast annotations are provided. Genes with no blast  
664 annotation or annotated as uncharacterized protein are indicated as “unannotated”. The Rhy  
665 (rhythmic) column indicates genes that are significantly rhythmic in at least one of the ant  
666 castes. The DRG column indicates genes that are significantly rhythmic in both castes but  
667 oscillating at different periodicities. Genes that code for proteins previously found in the  
668 trophalactic fluid of *C. floridanus* are indicated in the Troph column.

669

670 Looking for oscillating genes among the DEGs that we identified in *C. floridanus*, we  
671 found that more than one-third (i.e., 28 of the 81 DEGs) were expressed rhythmically in  
672 either forager or nurse brains (Fig. 6). Of these clock-controlled DEGs, five genes oscillated  
673 at different periodicities in the two ant castes, providing further support for potential links  
674 between chronobiological and behavioral plasticity in *C. floridanus*. One of these  
675 differentially rhythmic genes, *Cyclin-dependent kinase 4 (Cdk4)*, was higher expressed and  
676 cycled every 12h in forager brains, while it cycled with an overall lower expression in nurse  
677 brains every 24h (Fig. 6, Additional File 9, sheet 1). Conserved in flies and mammals, *Cdk4*  
678 encodes a protein that regulates the JAK-STAT and TORC1 signaling pathway, and as such,  
679 is important for innate immune response and insulin signaling in insects. The Insulin/IGF-1  
680 signaling (IIS) pathway is a known modulator of the circadian clock in insects [160], and a  
681 key pathway involved in longevity, fertility and behavioral division of labor in ants [161-  
682 163]. As such, the finding that *Cdk4* is both expressed at different levels throughout the day

683 and cycling differently in foragers and nurses could be indicating a direct link between clock-  
684 controlled gene expression and division of labor (Fig. 4).

685         The other four differentially rhythmic DEGs, *Alanine—glyoxylate aminotransferase*  
686 *2-like (Agxt2)*, *D-3-phosphoglycerate dehydrogenase (Phgdh)*, *Carcinine transporter-like*  
687 *(CarT)* and *Venom carboxylesterase-6*, showed a higher overall expression in nurse brains  
688 where they cycled every 24h, while foragers exhibited an 8h oscillation in expression (Fig. 6,  
689 Additional File 9, sheet 1). The gene *Agxt2* regulates nitric oxide (NO) signaling [164], which  
690 in *Drosophila* has been shown to mediate neuro-glia interactions that shape circadian  
691 locomotory rhythms [165, 166]. Additionally, there is a growing body of literature that  
692 suggests a key role of glia in maintaining circadian rhythms in activity and rest [166]. As  
693 such, glia could also be playing a role in regulating plasticity of locomotory rhythms in ants.  
694 However, *Agxt2* does not appear to be rhythmically expressed in *Drosophila* while we found  
695 it to be differentially rhythmic across behavioral ant castes. As such, its role in ants might be  
696 different (Fig. 4).

697         Like vertebrates, insects have functional N-methyl-D-aspartate (NMDA) glutamate  
698 receptors. Such receptors are thought to play a role in synaptic plasticity, memory, and  
699 neuronal development in vertebrates and mediate juvenile hormone (JH) biosynthesis in  
700 insects [167]. The gene *Phgdh* catalyzes the first step in L-serine synthesis [168, 169], thus,  
701 regulating the availability of L-serine, which controls NMDA receptor function [168, 170-  
702 172]. Therefore, *Phgdh* could be indirectly affecting JH levels in insects such as ants and  
703 result in different behaviors across the forager and nurse castes that appear to express this  
704 gene both in different quantities and at different oscillation rates (Fig. 4). This could be in  
705 conjunction with the differentially oscillating DEG *venomcarboxylesterase-6* (Fig. 6,  
706 Additional File 9, sheet 1), which modulates JH levels through its function as a JH esterase  
707 [73, 173] (more about this gene in the section below). Additionally, glutamate and its

708 receptors have been found to regulate task specialization associated with division of labor in  
709 social insects [174-176], and expression of social traits in vertebrates including humans [177,  
710 178]. Therefore, significant differences in *Phgdh*-mediated glutamate signaling in nurse and  
711 forager brains might be contributing to the caste-associated differences in social behavior  
712 (Fig. 4). Alternatively, *Phgdh* could be indirectly involved in photo-induced locomotor  
713 rhythms since glutamatergic neurotransmission is said to be important for circadian  
714 photoentrainment in both vertebrates and invertebrates [179, 180].

715         The differentially rhythmic gene *CarT* (Fig. 6, Additional File 9, sheet 1) also has an  
716 indirect role in phototransduction, but via histamine recycling [181]. The biogenic amine  
717 histamine is synthesized in photoreceptors and released from the compound eyes [182, 183]  
718 to regulate sleep via the (visual) photic and the (non-visual) motion detection pathways [184-  
719 187]. Eventually, the epithelial glia cells communicate with photoreceptor cells to drive  
720 conversion of histamine to carcinine [181]. CarT transports this carcinine back into  
721 photoreceptor neurons, which is an essential step in the histamine-carcinine cycle [181]. As  
722 such, overall different expression levels and oscillation patterns in *CarT* between nurses and  
723 foragers, possibly indirectly driven by different external photic and motion detection cues  
724 that induce histamine production, could be involved in regulating the different activity  
725 patterns of the two castes (Fig. 4). This differentially rhythmic DEG, as well as the other  
726 three we discussed above, can be indirectly tied to clock entrainment and clock-controlled  
727 locomotory output, which highlights the potential link between differential gene expression,  
728 circadian plasticity and behavioral plasticity in ants (Fig. 4). However, functional testing will  
729 be required to confirm and understand their exact roles.

730         Even though not much is known about the role of circadian clocks in regulating  
731 behavioral plasticity in ants, studies have looked into the molecular basis of behavioral  
732 division of labor and, in doing so, have identified several genes that seem to be central

733 regulators of behavioral plasticity in social insects [188]. Caste-specific differences in larval  
734 storage proteins, especially Vitellogenin (*Vg*) and Arylphorin subunit alpha, and JH have  
735 been consistently found across social insects. In bees, for example, high *Vg* levels and low JH  
736 titers correlate with nurse-like behaviors [189], whereas downregulation of *Vg* results in  
737 increased JH titers and a behavioral state characteristic of forager bees [190]. In line with  
738 this, nurses of the fire ant *Solenopsis invicta* show significantly higher *Arylphorin subunit*  
739 *alpha* expression as compared to the foragers [191]. Consistent with these previous findings,  
740 we found *C. floridanus* nurse brains to have significantly higher *Arylphorin-subunit-alpha*  
741 (50-fold) and *Vg* (6-fold) expression as compared to foragers (Fig. 6, Additional File 9, sheet  
742 1). Additionally, our data showed that *Vg* expression is significantly oscillating every 24h in  
743 nurse brains. Although not significant, *Arylphorin subunit alpha* also showed a *Vg*-like  
744 oscillatory expression in nurse brains ( $\tau = 24\text{h}$ ,  $p = 0.09$ ) (Additional File 5). However,  
745 forager brains showed no such rhythms in *Vg* or *Arylphorin subunit alpha* expression. As  
746 such, our study provides further support for a role of *Vg* and *Arylphorin subunit alpha* in  
747 behavioral division of labor and highlights a putative clock-control of these genes in nurse  
748 brains (Fig. 4). Nevertheless, the potential functional role of a rhythmic *Vg* expression in ant  
749 physiology or behavior remains to be explored.

750

### 751 **Social regulation of differentially expressed genes**

752 In addition to identifying several putatively clock-controlled DEGs, we found evidence for  
753 trophallactic fluid having a potential role in regulating division of labor in *C. floridanus*. Ants  
754 use trophallactic fluid as a way to exchange food and social cues. Such inter-individual  
755 interactions are usually more frequent within a behavioral caste [192]. This makes it likely  
756 that the trophallactic fluid contents differ between forgers and nurses, which might help  
757 maintain behavioral and physiological states associated with the specific castes. Nevertheless,

758 a role for trophallactic fluid in regulating caste-specific gene expression has not been  
759 investigated yet. We do not currently know how and if the trophallactic fluid of forager and  
760 nurse ants differs. However, the trophallactic fluid of *C. floridanus* has been characterized by  
761 pooling fluid from both foragers and nurses [73]. We compared our list of DEGs between  
762 foragers and nurses with the previously reported proteins found in the trophallactic fluid of *C.*  
763 *floridanus* to investigate if trophallactic fluid could be a potential social regulator of caste-  
764 associated behavior. We found that more than a quarter (13 out of 47) of all genes that were  
765 significantly higher expressed in nurses compared to foragers encoded such orally transferred  
766 proteins (Fig. 6). Among these thirteen genes, only two showed significant daily oscillations  
767 in gene expression; the previously mentioned *venom-carboxylesterase-6* and a *mediator of*  
768 *RNA polymerase II transcription subunit alpha 12*.

769 Previous work showed that the trophallactic fluid of *C. floridanus* contained venom-  
770 carboxylesterase-6 JH esterases (JHEs). JHEs are enzymes that degrade JH in insect  
771 hemolymph, thus, regulating JH titers and its associated behaviors in ants [73, 173]. For  
772 instance, increasing JH levels in leafcutter ants results in increased phototaxis and extranidal  
773 activity [193]. The role of JH in regulating extranidal foraging has been demonstrated in  
774 honeybees as well [194, 195]. Moreover, experimentally introducing inhibitors of JHE, or JH  
775 itself, in the trophallactic network of *C. floridanus* workers increased larval growth and rate  
776 of pupation [69, 73]. In addition to affecting larval development, JHE levels were also shown  
777 to be affected by social context as the amount of venom-carboxylesterase-6 was significantly  
778 reduced in the trophallactic fluid of ants upon social isolation [73]. We found that all three  
779 copies of the putative JHE *venom-carboxylesterase-6* in the *C. floridanus* genome were  
780 significantly higher expressed in nurse brains, as compared to foragers (Fig. 6). This is in line  
781 with the expectation that nurses would have lower JH levels. The significantly higher  
782 expression levels of *venom-carboxylesterase-6* in nurses likely have a suppressing effect on

783 JH-mediated foraging through the degradation of JH [194]. Additionally, as we mentioned  
784 above, the expression of *venom-carboxylesterase-6* showed differential rhythmicity between  
785 the two ant castes, oscillating every 24h in nurses and every 8h in foragers. While this was  
786 only the case for one of the three esterases, this indicates that there could be potential daily  
787 fluctuations of JH titers in in the nurse caste. The peak of the oscillating *venom-*  
788 *carboxylesterase-6* gene in nurse brains was around ZT12-14, which corresponds to the peak  
789 time of colony foraging that we found in *C. floridanus* (Fig. 1, Additional File 4 and 6). The  
790 *venom-carboxylesterase-6* mediated dip in JH levels could, thus, be contributing to a lower  
791 propensity of nurses to engage in extranidal tasks during peak colony foraging hours. In line  
792 with this reasoning, we found that the lowest dip in forager *venom-carboxylesterase-6*  
793 expression, and likely corresponding increased levels of JH, occur at ZT12, the onset of peak  
794 foraging activity (Fig. 1, Additional File 4 and 6). As such, the significantly different levels  
795 of JHEs, and therefore JH, in the trophallactic fluid of foragers and nurses, and the clock-  
796 controlled fluctuations within those expression levels, could be contributing to the regulation  
797 of differential locomotory activity in these castes (Fig. 4).

798

## 799 **Conclusion**

800           The study presented here is providing a first look at the clock-controlled pathways in  
801 ants that could underlie caste-associated behavioral plasticity and sheds new light on the links  
802 between molecular timekeeping and behavioral division of labor in social insects.  
803 Understanding how an ant's biological clock can predictably interact with its environment to  
804 produce distinct, yet stable, caste-associated chronotypes, lays the foundation for further  
805 molecular investigations into the role of biological clocks in regulating polyphenism in ant  
806 societies.

807           To produce high-interval time course data that reflects the transcriptional differences  
808 between forager and nurse ants throughout a 24h day, we used a behavioral setup that  
809 allowed us to reliably sample and obtain daily behavioral and brain gene expression patterns  
810 that appeared to be a good representation of these behavioral castes. In fact, the behavioral  
811 activity data that we were able to collect as part of these endeavors had high enough  
812 resolution to even identify how the colony is able to quickly get back on track with regards to  
813 food collection efforts after a disturbance. More importantly, we found a reduced circadian  
814 time keeping in nurses as compared to foragers. This was evidenced by the vastly different  
815 number of genes that oscillated every 24h in each ant caste, and the temporal segregation of  
816 clock-controlled processes, which is detectable in both castes but to a lesser extent in nurses.  
817 Our findings are, therefore, in line with the results of a previous study done in honeybees,  
818 which indicates that a difference in circadian gene repertoire between foragers and nurses  
819 could be a more general phenomenon within eusocial Hymenoptera, and likely contributes to  
820 the caste-specific differences observed in behavioral activity rhythms.

821           Moreover, many genes that showed a circadian expression in forager brains were  
822 expressed in an ultradian manner in nurses, instead of being entirely arrhythmic. Among the  
823 differentially rhythmic genes were essential components of the core and auxiliary feedback



824 loops that form the endogenous clock of insects, as well as genes involved in metabolism,  
825 cellular communication and protein modification (Fig. 4). The ability of core clock and  
826 clock-controlled genes to oscillate at different harmonics of the circadian rhythm, and to  
827 switch oscillations from one periodicity to the other due to age or colony demands, might  
828 explain why chronotypes associated with ant behavioral castes are stable in undisturbed  
829 conditions, yet highly plastic and responsive to changes in their social context. However, it  
830 remains to be seen if the caste-associated differential rhythmicity that we observed is a  
831 general phenomenon across ant and other eusocial societies, or a species-specific trait. In  
832 addition, the potential for an actual adaptive function for maintaining both circadian and  
833 ultradian rhythms in ant colonies will have to be further explored.

834         In addition to the indications that caste-specific behavioral phenotypes could be the  
835 result of genes that oscillate at different speeds, we also found evidence that different  
836 functions of the same genes or pathways might be employed under the different  
837 environmental contexts that these ants are in. As such, the behavior of nurse ants that remain  
838 in a dark nest could be regulated by different functions of *Rho* or activation pathways of *Pkc*  
839 than foragers who are detecting light at set times of days, due to exposure to distinct set of  
840 social cues and colony environment (Fig. 4). Our enrichment analyses showed that foragers  
841 and nurses could be expressing different genes with similar functions during the subjective  
842 night-time, while they use the same genes during the subjective daytime. Additionally, we  
843 found evidence for a role of trophallactic fluid in regulating differential gene expression  
844 between foragers and nurses. Several of the differentially expressed genes showed robust  
845 daily rhythms in either forager or nurse brains, including *Vg* and *venom-carboxylesterase-6*  
846 that are known regulators of JH titers in insects (Fig. 4). Given the central role of *Vg* and JH  
847 in regulating division of labor in social insects, we propose that a mechanistic link between  
848 plasticity of the circadian clock and division of labor likely exists. Overall, this study allowed

849 us to identify *C. floridanus* genes potentially involved in social entrainment of the  
850 endogenous clock, clock-controlled plasticity in behavior, and social regulation of division of  
851 labor.

## 852 **Methods**

### 853 ***Camponotus floridanus* collection and husbandry**

854 We collected a queen-absent colony of *C. floridanus* containing more than a thousand  
855 workers and abundant brood (eggs, larvae and pupa) from the University of Central Florida  
856 Arboretum in late April of 2019. We housed the colony in a fluon coated (BioQuip) plastic  
857 box (dimensions 42 x 29 cm, Rubbermaid) with a layer of damp plaster (Plaster of Paris)  
858 covering the bottom. We provided 15% sugar solution and water *ad libitum* and fed crickets  
859 to the colony every 2-3 days. We also provided the colony with multiple light-impervious,  
860 humid test-tube chambers (50 mL, Fisher Scientific) which they readily moved their brood  
861 into and used as a nest. Until the start of the experiment, we kept the colony in this setup  
862 inside a climate-controlled incubator (I36VL, Percival) at 25°C, 75% relative humidity (rH),  
863 and a 12h:12h light-dark (LD) cycle.

864

### 865 ***Experimental setup and timeline***

866 To allow for visible behavioral division of labor between morphologically indistinguishable  
867 forager and nurse ant castes (see definitions below), we built a formicarium consisting of a  
868 nest box and a foraging arena (42 x 29 cm each, Rubbermaid). Both boxes had a layer of  
869 damp plaster covering the bottom. We carved multiple grooves into the plaster of the nest  
870 box to imitate nest chambers and kept the box covered at all times to ensure completely dark  
871 conditions. We placed the nest in a temperature-controlled darkroom at constant temperature  
872 and humidity (25°C, 70% rH). The foraging arena was placed inside a climate-controlled  
873 incubator (I36VL, Percival) under a 12h:12h LD cycle without twilight cues. Lights ramped  
874 from zero to >2000 lux within a minute when lights were turned on at Zeitgeber Time, ZT24  
875 (or, ZT0, which indicates the same time of day) and turned off within the same short time at  
876 ZT12 (Additional File 10). We maintained constant temperature (25°C) and humidity (75%

877 rH) inside the incubator to ensure that the LD cycle was the primary rhythmically occurring  
878 cue, i.e., *Zeitgeber*, for circadian entrainment (Additional File 10). Abiotic factors in the  
879 foraging arena and nest box were monitored using HOBO data loggers (model U12, Onset)  
880 that logged light levels, temperature and humidity at 30 second intervals (Additional File 10).  
881 Food was provided *ad libitum* on an elevated circular feeding stage in the foraging arena to  
882 distinguish active feeding bouts from general extranidal visits (Additional File 11A). Feeders  
883 were replenished, and fresh frozen crickets were provided, every day between ZT2 and ZT4,  
884 throughout the experiment. The nest box was connected to the foraging arena with a 1.5m  
885 long plastic tube (i.e., *Tunnel*, Additional File 11A), which allowed ants to visit to the  
886 foraging arena at any time of the day.

887 Once the formicarium was set up, we transferred the entire colony along with brood into the  
888 foraging arena. To incentivize the colony to move their brood into the dark nest box, we kept  
889 the foraging arena under constant light for three consecutive days. This also aided in the  
890 resetting of their biological clocks to allow for synchronized entrainment to the 12h:12h LD  
891 cycle. After 5 days of initial entrainment, we identified and marked foragers for three  
892 consecutive days (Day 6-8, Fig. 1, see below for details on mark-and-recapture). This was  
893 followed by another four days of entrainment (Pre-sampling entrainment, Day 9-12, Fig. 1)  
894 before we sampled nurse and forager ants at two-hour intervals, spanning an entire LD cycle  
895 on day 13 (see below for sampling details).

896

### 897 ***Colony activity monitoring***

898 The extranidal or outside nest activity of the colony (called *activity* from here on) was used as  
899 a proxy for detecting rhythmicity in colony behavior. Before sampling ants for RNASeq, we  
900 analyzed the activity data to (a) confirm colony entrainment to the LD cycle, (b) identify  
901 peak activity hours for forager identification and painting, and (c) confirm pre-sampling

902 entrainment after foragers had been marked. We monitored colony activity during the entire  
903 experimental period by recording time-lapse videos of the foraging arena using a modified  
904 infra-red enabled camera (GoPro Hero 6) at 4K resolution, set to capture one frame every 30  
905 seconds at a wide field of view. To facilitate night-time recording, we installed a low  
906 intensity near-infrared light (850 nm, CMVision YY-IR30) above the foraging arena. We  
907 quantified extranidal activity throughout the experiment by counting the number of ants in  
908 the foraging arena on the feeding stage (FS) and off the feeding stage (FA, i.e., foraging  
909 arena) at one-hour intervals. The activity data can be found in Additional File 12.

910

### 911 ***Identification of *Camponotus floridanus* behavioral castes***

912 To measure and compare their daily rhythms in gene expression, we set out to sample minor  
913 worker ants of the behaviorally distinct foraging and nursing castes. We defined foragers as  
914 individuals that perform outside-nest (extranidal) tasks, including foraging for food. To  
915 identify foragers, we used a mark and recapture strategy. For three consecutive nights (Day  
916 6-8, Fig. 1), we collected ants from the foraging arena during peak hours of extranidal  
917 activity (ZT13 to ZT16) as well as during relative dawn (ZT23 to ZT24). We marked new  
918 captures with a dab of white paint (Testors Enamel Paint) on their abdomen. Recaptures were  
919 marked with a second dab of white paint on their thorax. After painting, the ants were  
920 released back into the foraging arena. Since peak foraging hours took place during the night-  
921 time, we installed a 660 nm red lightbulb (Byingo LED) in the darkroom and wore a red  
922 headlamp (Petzl Tikka) to provide us with enough visibility to perform the mark-recapture,  
923 while simultaneously minimally disturbing the ants. We identified and marked more than a  
924 hundred foragers at the end of the three-day forager identification phase (109 doubly marked,  
925 and 39 singly marked). Post forager identification, the whole colony was left undisturbed and

926 allowed to recover from potential stress for four consecutive days of pre-sampling  
927 entrainment, prior to sampling ants for RNASeq.

928         We defined nurses as ants that predominantly stay inside the dark nest chambers  
929 (intranidal) and care for brood. As such, we identified nurses as unmarked individuals in the  
930 colony that were unlikely to have gone outside the nest and were in contact with the brood.  
931 To confirm that the bulk of brood care inside the nest was performed by unmarked ants, and  
932 not marked foragers, we performed qualitative intermittent behavioral observations for a total  
933 of 1-2 hours per day during the pre-sampling entrainment period that followed mark-  
934 recapture (Days 9-11, Fig. 1). We observed the nest chambers under the same red light (660  
935 nm) that illuminated the darkroom. Monitoring behavior inside the nest confirmed that  
936 marked “foragers” were less likely to be in direct contact with the brood (i.e., walking on the  
937 brood pile or grooming brood) and were not seen to be involved in brood relocation within  
938 the nest chambers. As such, we identified nurses as “unmarked” individuals found in direct  
939 contact with the brood or involved in brood care including relocation.

940

#### 941 *Ant sampling and brain dissections*

942 After identifying foragers and nurses and 12 days of colony entrainment to the 12h:12h LD,  
943 we collected ants for RNASeq under the same light-dark regime. We sampled ants from the  
944 colony every 2 hours over a 24-hour period, starting two hours after lights were turned on  
945 (ZT2) (Additional File 11B). At each sampling time point, we collected three foragers and  
946 three nurses from the colony and transferred them into individually labelled cryotubes (USA  
947 Scientific) for immediate flash freezing in liquid nitrogen. The whole process, from  
948 collection to flash freezing, took less than 60 seconds per sampled ant. Since *C. floridanus*  
949 foraging activity is predominantly nocturnal, we sampled foragers from inside the dark nest  
950 box during the light phase, and from the foraging arena during the dark phase (Additional

951 File 11B). Nurses were always collected from inside the nest box. For sampling under dark  
952 conditions, we used the same intensity red-light as described for the mark-recapture and  
953 behavioral observations described above. Using this sampling regime, we collected 72 ants,  
954 which were stored at  $-80^{\circ}\text{C}$  until brain dissection.

955 To compare transcriptome-wide daily gene expression patterns in the brain tissue of  
956 foragers and nurses, we performed brain dissections of individual flash-frozen ants in ice-  
957 cold Hanks' balanced salt solution (HBSS) buffer under a dissecting microscope. To further  
958 preserve RNA integrity and quality, we performed brain dissections as swiftly as possible:  
959 brain dissections of individual foragers took an average of  $4.6 (\pm 0.7)$  mins, whereas for a  
960 nurse it took  $4.5 (\pm 0.5)$  mins. Immediately after dissection, brains were flash frozen again in  
961 cryotubes (USA Scientific) kept on dry ice. For each behavioral caste, at each sampling time  
962 point, we pooled three individually dissected brain samples for RNA extraction and  
963 sequencing (Additional File 11C). The resulting 24 samples were again stored at  $-80^{\circ}\text{C}$  until  
964 RNA extraction and library preparation. This sampling approach was designed to adhere to  
965 current recommendations for genome-wide time course studies using non-model systems [60,  
966 196]. By pooling triplicates, we have accounted for intra-colony variation while still being  
967 able to choose a high sampling frequency (every 2h) and read depth per sample ( $\geq 20\text{M}$  per  
968 sample, see below) in order to maximize accurate detection of the majority of cycling  
969 transcripts in *C. floridanus* brains [197].

970

### 971 ***RNA extraction, library preparation and RNASeq***

972 To obtain time course transcriptomes for each of the behavioral castes, we extracted  
973 total RNA to prepare sequencing libraries for Illumina short-read sequencing. Two frozen  
974 steel ball bearings ( $5/32''$  type 2B, grade 300, Wheels Manufacturing) were added to each  
975 cryotube containing the pooled brain tissues to homogenize them using a 1600 MiniG tissue

976 homogenizer (SPEX) at 1300 rpm for 30 sec while keeping the samples frozen. We isolated  
977 total RNA from the disrupted brain tissues with Trizol (Ambion) followed by a wash with  
978 chloroform (Sigma) and a purification step using RNeasy MinElute Cleanup columns and  
979 buffers (Qiagen) [198]. For each library preparation, we used 500 ng total RNA to extract  
980 mRNA with poly-A magnetic beads (NEB) and converted this mRNA to 280-300 bp cDNA  
981 fragments using the Ultra II Directional Kit (NEB). Unique sequencing adapters were added  
982 to each cDNA library for multiplexing (NEB). All twenty-four cDNA libraries were  
983 sequenced as 50 bp single-end reads using two lanes on an Illumina HiSeq1500 at the  
984 Laboratory for Functional Genome Analysis (Ludwig-Maximilians-Universitat Gene Center,  
985 Munich). Read data are available under BioProject PRJNA704762. After sequencing, we  
986 removed sequencing adapters and low-quality reads from our RNASeq data with BBDuk  
987 [199] as a plug-in in Geneious (parameters: right end-low quality trim, minimum 20; trim  
988 both ends - minimum length 25 bp) (Biomatters). Post-trimming, we retained an average of  
989 22 million reads per sample, which is well beyond the minimal read depth sufficient to  
990 identify the majority of high amplitude circadian transcripts in insects (Li et al., 2014) [197].  
991 Subsequently, we used HISAT2 [200] to map transcripts to the latest Cflo v7.5 genome  
992 [201], followed by normalizing each sample to Fragments Per Kilobase of transcript per  
993 Million (FPKM) with Cuffdiff [202].

994

### 995 ***Data analyses***

996 We confirmed daily rhythms in colony activity with the WaveletComp package [74].  
997 Using wavelet analyses, we investigated the extranidal activity of foragers for the presence of  
998 circadian rhythms in colony behavior, the potential presence of ultradian rhythms, and to  
999 infer synchronicity between the number of ants actively feeding or present on the feeding  
1000 stage (*FS*), and those present in the remainder of the foraging arena (*FA*).



1001 We used the rhythmicity detection algorithm empirical JTK-Cycle (eJTK) [76, 77] to  
1002 test for significant circadian and ultradian rhythms in gene expression in foragers and nurses  
1003 using waveforms of period lengths ( $\tau$ ) equal to 24h, 12h and 8h. Only genes that had diel  
1004 expression values  $\geq 1$  FPKM for at least half of all sampled timepoints were tested for  
1005 rhythmicity. For a set period length, a gene was considered to be significantly rhythmic if it  
1006 had a Gamma p-value  $< 0.05$ . To test if certain genes could be clustered together based on  
1007 similar temporal peak activity, we used an agglomerative hierarchical clustering framework  
1008 (method = complete linkage) using the ‘hclust’ function in the ‘stats’ package for R.

1009 Time-course sampling of foragers and nurses enabled us to account for diel  
1010 fluctuations in expression levels when identifying genes that were differentially expressed  
1011 between the two ant groups throughout the day (i.e., DEGs). To determine differentially  
1012 expressed genes, we used the linear modelling framework proposed in LimoRhyde [203], but  
1013 without an interaction between treatment and time. A gene was considered differentially  
1014 expressed if treatment was found to be a significant predictor (at 5% FDR) and the difference  
1015 in mean diel expression between foragers and nurses was at least 2-fold (i.e.,  $\text{abs}(\log_2\text{-fold-}$   
1016  $\text{change}) \geq 1$ ). LimoRhyde is generally used to test if genes are differentially rhythmic in  
1017 phase or amplitude, inferred from a significant interaction between treatment and time.  
1018 However, we did not find significant differences in phase or amplitude for any of the  
1019 circadian genes. Therefore, we indicated a gene as differentially rhythmic (i.e., DRGs) if it  
1020 significantly cycled in both ant castes but with different period lengths.

1021 To perform functional enrichment analyses of significant gene sets, we wrote a  
1022 customized function that performs a hypergeometric test through the *dhyper* function in R.  
1023 The code is available on GitHub ([https://github.com/debekkerlab/Will\\_et\\_al\\_2020](https://github.com/debekkerlab/Will_et_al_2020)). The  
1024 function takes the following inputs: (1) user-provided geneset to test enrichment on, (2) user-  
1025 provided background geneset to test enrichment against, and (3) functional gene annotations

1026 (e.g., GO terms) to test enrichment for. Among other things, the function outputs a Benjamini  
1027 Hochberg-corrected p-value for each annotation term to indicate if it is significantly enriched  
1028 in the test geneset. We used all genes that were found to be “expressed” ( $\geq 1$  FPKM  
1029 expression for at least one sample) in the brains of foragers or nurses as the background  
1030 geneset for functional enrichment tests. To analyze the functional enrichment of Gene  
1031 Ontology (GO) predictions, we used the GO term annotations [71] for the most recent *C.*  
1032 *floridanus* genome (v 7.5) [201]. We only tested terms annotated for at least 5 protein coding  
1033 genes and significance was inferred at 5% FDR.

1034 Homologs of known core-clock genes (*cgs*) and clock-modulator genes (*cmgs*) in *C.*  
1035 *floridanus* were identified using previously published hidden-markov-models (HMMs) for  
1036 well-characterized clock proteins of two model organisms: *Drosophila melanogaster* and  
1037 *Mus musculus* [204]. We used *hmmsearch* to query these HMM profiles against the entire  
1038 *C. floridanus* proteome (Cflo\_v7.5) [201] with default parameters (HMMER v3.2.1 [205]).  
1039 To identify orthologs shared between *C. floridanus* and flies, mammals or honey bees we  
1040 used *proteinortho5* [206].

1041 All data wrangling, statistical tests and graphical visualizations were performed in  
1042 RStudio [207] using the R programming language v3.5.1 [208]. Heatmaps were generated  
1043 using the *heatmap* [209] and *viridis* [210] packages. Upset diagrams were used to visualize  
1044 intersecting gene sets using the *UpsetR* package [211].

1045 **Declarations**

1046 **Ethics approval and consent to participate:**

1047 Not applicable

1048 **Consent for publication:**

1049 Not applicable

1050 **Availability of data and materials:**

1051 Raw sequencing reads generated for this study have been deposited in NCBI under  
1052 BioProject PRJNA704762. The datasets supporting the conclusions of this article are  
1053 included within the article and its additional files. Data analysis and visualization for this  
1054 study was done using code written in R, Python and Bash, and can be found through GitHub  
1055 ([https://github.com/debekkerlab/Das\\_et\\_al\\_2021](https://github.com/debekkerlab/Das_et_al_2021)). Additionally, an RSQLite database  
1056 containing all processed data can be provided upon request.

1057 **Competing Interests:**

1058 The authors declare that they have no competing interests.

1059 **Funding:**

1060 This work was supported by NSF Career Award 1941546 and start-up funds from the  
1061 University of Central Florida made available to CdB.

1062 **Author's contributions:**

1063 BD and CdB both conceived of the study, analyzed the data and have written the manuscript.

1064 All experiments were performed by BD.

1065 **Acknowledgements:**

1066 We thank the Laboratory for Functional Genome Analysis and Genomics Services Unit and  
1067 Adreas Brachmann at the Ludwig Maximilians Universität for sequencing support. We also  
1068 thank Ian Will for his assistance in the processing of our raw sequencing data, Daniel A.  
1069 Friedmann for sharing brain dissection videos, Thienthanh Trinh, Veronica Urgiles, Leo

1070 Ohyama and Jordan Dowell for extensive discussions about the study, and Alicia Formanack

1071 for providing feedback on early drafts of the manuscript.

1072

1073 **References**

- 1074 1. Sharma VK: **Adaptive Significance of Circadian Clocks.** *Chronobiology International*  
1075 2003, **20**(6):901-919.
- 1076 2. Paranjpe DA, Sharma VK: **Evolution of temporal order in living organisms.** *J*  
1077 *Circadian Rhythms* 2005, **3**(1):7.
- 1078 3. Yerushalmi S, Green RM: **Evidence for the adaptive significance of circadian**  
1079 **rhythms.** *Ecol Lett* 2009, **12**(9):970-981.
- 1080 4. Bell-Pedersen D, Cassone VM, Earnest DJ, Golden SS, Hardin PE, Thomas TL, Zoran  
1081 MJ: **Circadian rhythms from multiple oscillators: lessons from diverse organisms.**  
1082 *Nature Reviews Genetics* 2005, **6**(7):544-556.
- 1083 5. Johnson CH, Stewart PL, Egli M: **The cyanobacterial circadian system: from**  
1084 **biophysics to bioevolution.** *Annual review of biophysics* 2011, **40**:143-167.
- 1085 6. Rund SSC, O'Donnell AJ, Gentile JE, Reece SE: **Daily Rhythms in Mosquitoes and**  
1086 **Their Consequences for Malaria Transmission.** *Insects* 2016, **7**(2).
- 1087 7. Helfrich-Förster C: **The Drosophila clock system.** In: *Biological timekeeping: Clocks,*  
1088 *rhythms and behaviour.* Springer; 2017: 133-176.
- 1089 8. Häfker NS, Meyer B, Last KS, Pond DW, Hüppe L, Teschke M: **Circadian Clock**  
1090 **Involvement in Zooplankton Diel Vertical Migration.** *Current Biology* 2017,  
1091 **27**(14):2194-2201.e2193.
- 1092 9. Eelderink-Chen Z, Bosman J, Sartor F, Dodd AN, Kovács ÁT, Meroow M: **A circadian**  
1093 **clock in a nonphotosynthetic prokaryote.** *Science Advances* 2021, **7**(2):eabe2086.
- 1094 10. McCluskey ES: **Circadian-Rhythms in Male-Ants of Five Diverse Species.** *Science*  
1095 1965, **150**(3699):1037-1039.
- 1096 11. Roces F, Núñez JA: **Brood translocation and circadian variation of temperature**  
1097 **preference in the ant Camponotus mus.** *Oecologia* 1989, **81**(1):33-37.
- 1098 12. Falibene A, Roces F, Rössler W, Groh C: **Daily thermal fluctuations experienced by**  
1099 **pupae via rhythmic nursing behavior increase numbers of mushroom body**  
1100 **microglomeruli in the adult ant brain.** *Front Behav Neurosci* 2016, **10**:73.
- 1101 13. Sharma VK, Lone SR, Goel A, Chandrashekar M: **Circadian consequences of social**  
1102 **organization in the ant species Camponotus compressus.** *Naturwissenschaften*  
1103 2004, **91**(8):386-390.
- 1104 14. Ingram KK, Kutowoi A, Wurm Y, Shoemaker D, Meier R, Bloch G: **The molecular**  
1105 **clockwork of the fire ant Solenopsis invicta.** *PLoS One* 2012, **7**(11):e45715.
- 1106 15. Bloch G: **The social clock of the honeybee.** *J Biol Rhythms* 2010, **25**(5):307-317.
- 1107 16. Rodriguez-Zas SL, Southey BR, Shemesh Y, Rubin EB, Cohen M, Robinson GE, Bloch G:  
1108 **Microarray analysis of natural socially regulated plasticity in circadian rhythms of**  
1109 **honey bees.** *J Biol Rhythms* 2012, **27**(1):12-24.
- 1110 17. Levine JD, Funes P, Dowse HB, Hall JC: **Resetting the circadian clock by social**  
1111 **experience in Drosophila melanogaster.** *Science* 2002, **298**(5600):2010-2012.
- 1112 18. Rensing L, Ruoff P: **TEMPERATURE EFFECT ON ENTRAINMENT, PHASE SHIFTING,**  
1113 **AND AMPLITUDE OF CIRCADIAN CLOCKS AND ITS MOLECULAR BASES.**  
1114 *Chronobiology International* 2002, **19**(5):807-864.
- 1115 19. Helfrich-Förster C: **Light input pathways to the circadian clock of insects with an**  
1116 **emphasis on the fruit fly Drosophila melanogaster.** *Journal of Comparative*  
1117 *Physiology A* 2019:1-14.

- 1118 20. Lewis P, Oster H, Korf HW, Foster RG, Erren TC: **Food as a circadian time cue —**  
1119 **evidence from human studies.** *Nature Reviews Endocrinology* 2020, **16**(4):213-223.
- 1120 21. Yamazaki S, Numano R, Abe M, Hida A, Takahashi R-i, Ueda M, Block GD, Sakaki Y,  
1121 Menaker M, Tei H: **Resetting Central and Peripheral Circadian Oscillators in**  
1122 **Transgenic Rats.** *Science* 2000, **288**(5466):682.
- 1123 22. Bennett MM, Rinehart JP, Yocum GD, Doetkott C, Greenlee KJ: **Cues for cavity**  
1124 **nesters: investigating relevant zeitgebers for emerging leafcutting bees, *Megachile***  
1125 **rotundata.** *Journal of Experimental Biology* 2018, **221**(10).
- 1126 23. Fuchikawa T, Eban-Rothschild A, Nagari M, Shemesh Y, Bloch G: **Potent social**  
1127 **synchronization can override photic entrainment of circadian rhythms.** *Nature*  
1128 *communications* 2016, **7**(1):1-10.
- 1129 24. Siehler O, Bloch G: **Colony Volatiles and Substrate-borne Vibrations Entrain**  
1130 **Circadian Rhythms and Are Potential Cues Mediating Social Synchronization in**  
1131 **Honey Bee Colonies.** *Journal of Biological Rhythms* 2020, **35**(3):246-256.
- 1132 25. Fujioka H, Abe MS, Fuchikawa T, Tsuji K, Shimada M, Okada Y: **Ant circadian activity**  
1133 **associated with brood care type.** *Biology letters* 2017, **13**(2):20160743.
- 1134 26. Fujioka H, Abe MS, Okada Y: **Ant activity-rest rhythms vary with age and interaction**  
1135 **frequencies of workers.** *Behavioral ecology and sociobiology* 2019, **73**(3):30.
- 1136 27. Bloch G, Toma DP, Robinson GE: **Behavioral rhythmicity, age, division of labor and**  
1137 **period expression in the honey bee brain.** *Journal of Biological Rhythms* 2001,  
1138 **16**(5):444-456.
- 1139 28. Ingram KK, Krummey S, LeRoux M: **Expression patterns of a circadian clock gene are**  
1140 **associated with age-related polyethism in harvester ants, *Pogonomyrmex***  
1141 **occidentalis.** *BMC Ecol* 2009, **9**:7.
- 1142 29. Ingram KK, Gordon DM, Friedman DA, Greene M, Kahler J, Peteru S: **Context-**  
1143 **dependent expression of the foraging gene in field colonies of ants: the interacting**  
1144 **roles of age, environment and task.** *Proc Biol Sci* 2016, **283**(1837).
- 1145 30. Dunlap JC: **Molecular bases for circadian clocks.** *Cell* 1999, **96**(2):271-290.
- 1146 31. Zhang Y, Emery P: **Molecular and neural control of insect circadian rhythms.** In:  
1147 *Insect molecular biology and biochemistry.* Elsevier; 2012: 513-551.
- 1148 32. Andreani TS, Itoh TQ, Yildirim E, Hwangbo DS, Allada R: **Genetics of Circadian**  
1149 **Rhythms.** *Sleep Med Clin* 2015, **10**(4):413-421.
- 1150 33. Sandrelli F, Costa R, Kyriacou CP, Rosato E: **Comparative analysis of circadian clock**  
1151 **genes in insects.** *Insect Molecular Biology* 2008, **17**(5):447-463.
- 1152 34. Hurley JM, Loros JJ, Dunlap JC: **Circadian Oscillators: Around the Transcription-**  
1153 **Translation Feedback Loop and on to Output.** *Trends Biochem Sci* 2016, **41**(10):834-  
1154 846.
- 1155 35. Partch CL, Green CB, Takahashi JS: **Molecular architecture of the mammalian**  
1156 **circadian clock.** *Trends Cell Biol* 2014, **24**(2):90-99.
- 1157 36. Top D, Young MW: **Coordination between differentially regulated circadian clocks**  
1158 **generates rhythmic behavior.** *Cold Spring Harbor Perspectives in Biology* 2018,  
1159 **10**(7):a033589.
- 1160 37. Horne JA, Östberg O: **A self-assessment questionnaire to determine morningness-**  
1161 **eveningness in human circadian rhythms.** *International journal of chronobiology*  
1162 1976.
- 1163 38. Roenneberg T, Wirz-Justice A, Mrosovsky M: **Life between clocks: daily temporal**  
1164 **patterns of human chronotypes.** *Journal of biological rhythms* 2003, **18**(1):80-90.

- 1165 39. Maury C, Serota MW, Williams TD: **Plasticity in diurnal activity and temporal**  
1166 **phenotype during parental care in European starlings, *Sturnus vulgaris*.** *Animal*  
1167 *Behaviour* 2020, **159**:37-45.
- 1168 40. Weinert D: **AGE-DEPENDENT CHANGES OF THE CIRCADIAN SYSTEM.** *Chronobiology*  
1169 *International* 2000, **17**(3):261-283.
- 1170 41. Gil K-E, Park C-M: **Thermal adaptation and plasticity of the plant circadian clock.**  
1171 *New Phytologist* 2019, **221**(3):1215-1229.
- 1172 42. van der Vinne V, Riede SJ, Gorter JA, Eijer WG, Sellix MT, Menaker M, Daan S, Pilonz  
1173 V, Hut RA: **Cold and hunger induce diurnality in a nocturnal mammal.** *Proceedings*  
1174 *of the National Academy of Sciences* 2014, **111**(42):15256.
- 1175 43. Randler C: **Sleep, sleep timing and chronotype in animal behaviour.** *Animal*  
1176 *Behaviour* 2014, **94**:161-166.
- 1177 44. Schwartz WJ, Helm B, Gerkema MP: **Wild clocks: preface and glossary.** In.: The Royal  
1178 Society; 2017.
- 1179 45. Dominoni DM, Helm B, Lehmann M, Dowse HB, Partecke J: **Clocks for the city:**  
1180 **circadian differences between forest and city songbirds.** *Proceedings of the Royal*  
1181 *Society B: Biological Sciences* 2013, **280**(1763):20130593.
- 1182 46. Graham JL, Cook NJ, Needham KB, Hau M, Greives TJ: **Early to rise, early to breed: a**  
1183 **role for daily rhythms in seasonal reproduction.** *Behavioral Ecology* 2017,  
1184 **28**(5):1266-1271.
- 1185 47. Moore D: **Honey bee circadian clocks: behavioral control from individual workers**  
1186 **to whole-colony rhythms.** *Journal of Insect Physiology* 2001, **47**(8):843-857.
- 1187 48. Mildner S, Rocas F: **Plasticity of Daily Behavioral Rhythms in Foragers and Nurses of**  
1188 **the Ant *Camponotus rufipes*: Influence of Social Context and Feeding Times.** *PLoS*  
1189 *One* 2017, **12**(1):e0169244.
- 1190 49. Tripet F, Nonacs P: **Foraging for work and age-based polyethism: the roles of age**  
1191 **and previous experience on task choice in ants.** *Ethology* 2004, **110**(11):863-877.
- 1192 50. Moore D, Rankin MA: **Circadian locomotor rhythms in individual honeybees.** *Physiol*  
1193 *Entomol* 1985, **10**(2):191-197.
- 1194 51. Bloch G, Robinson GE: **Reversal of honeybee behavioural rhythms.** *Nature* 2001,  
1195 **410**(6832):1048-1048.
- 1196 52. Eban-Rothschild A, Shemesh Y, Bloch G: **The colony environment, but not direct**  
1197 **contact with conspecifics, influences the development of circadian rhythms in**  
1198 **honey bees.** *Journal of biological rhythms* 2012, **27**(3):217-225.
- 1199 53. Ito H, Mutsuda M, Murayama Y, Tomita J, Hosokawa N, Terauchi K, Sugita C, Sugita  
1200 M, Kondo T, Iwasaki H: **Cyanobacterial daily life with Kai-based circadian and**  
1201 **diurnal genome-wide transcriptional control in *Synechococcus***  
1202 ***elongatus*.** *Proceedings of the National Academy of Sciences* 2009,  
1203 **106**(33):14168.
- 1204 54. Rund SS, Hou TY, Ward SM, Collins FH, Duffield GE: **Genome-wide profiling of diel**  
1205 **and circadian gene expression in the malaria vector *Anopheles gambiae*.** *Proc Natl*  
1206 *Acad Sci U S A* 2011, **108**(32):E421-430.
- 1207 55. Hughes ME, Grant GR, Paquin C, Qian J, Nitabach MN: **Deep sequencing the**  
1208 **circadian and diurnal transcriptome of *Drosophila* brain.** *Genome Res* 2012,  
1209 **22**(7):1266-1281.

- 1210 56. Rund SSC, Gentile JE, Duffield GE: **Extensive circadian and light regulation of the**  
1211 **transcriptome in the malaria mosquito *Anopheles gambiae*.** *BMC Genomics* 2013,  
1212 **14(1):218.**
- 1213 57. Zhang R, Lahens NF, Ballance HI, Hughes ME, Hogenesch JB: **A circadian gene**  
1214 **expression atlas in mammals: implications for biology and medicine.** *Proceedings of*  
1215 *the National Academy of Sciences* 2014, **111(45):16219-16224.**
- 1216 58. Hurley JM, Dasgupta A, Emerson JM, Zhou X, Ringelberg CS, Knabe N, Lipzen AM,  
1217 Lindquist EA, Daum CG, Barry KW: **Analysis of clock-regulated genes in *Neurospora***  
1218 **reveals widespread posttranscriptional control of metabolic potential.** *Proceedings*  
1219 *of the National Academy of Sciences* 2014, **111(48):16995-17002.**
- 1220 59. Ferrari C, Proost S, Janowski M, Becker J, Nikoloski Z, Bhattacharya D, Price D, Tohge  
1221 T, Bar-Even A, Fernie A *et al*: **Kingdom-wide comparison reveals the evolution of**  
1222 **diurnal gene expression in Archaeplastida.** *Nature Communications* 2019, **10(1):737.**
- 1223 60. Hughes ME, Abruzzi KC, Allada R, Anafi R, Arpat AB, Asher G, Baldi P, De Bekker C,  
1224 Bell-Pedersen D, Blau J: **Guidelines for genome-scale analysis of biological rhythms.**  
1225 *Journal of biological rhythms* 2017, **32(5):380-393.**
- 1226 61. Laloum D, Robinson-Rechavi M: **Methods detecting rhythmic gene expression are**  
1227 **biologically relevant only for strong signal.** *PLoS computational biology* 2020,  
1228 **16(3):e1007666.**
- 1229 62. Hansen LD, Klotz JH: **Carpenter ants of the United States and Canada:** Cornell  
1230 University Press; 2005.
- 1231 63. Gronenberg W, Heeren S, Hölldobler B: **Age-dependent and task-related**  
1232 **morphological changes in the brain and the mushroom bodies of the ant**  
1233 ***Camponotus floridanus*.** *Journal of Experimental Biology* 1996, **199(9):2011-2019.**
- 1234 64. Feldhaar H, Straka J, Krischke M, Berthold K, Stoll S, Mueller MJ, Gross R: **Nutritional**  
1235 **upgrading for omnivorous carpenter ants by the endosymbiont *Blochmannia*.** *BMC*  
1236 *Biology* 2007, **5:48:11 p.**
- 1237 65. Simola DF, Ye C, Mutti NS, Dolezal K, Bonasio R, Liebig J, Reinberg D, Berger SL: **A**  
1238 **chromatin link to caste identity in the carpenter ant *Camponotus floridanus*.**  
1239 *Genome Res* 2013, **23(3):486-496.**
- 1240 66. Gupta SK, Kupper M, Ratzka C, Feldhaar H, Vilcinskas A, Gross R, Dandekar T, Forster  
1241 F: **Scrutinizing the immune defence inventory of *Camponotus floridanus* applying**  
1242 **total transcriptome sequencing.** *BMC Genomics* 2015, **16:540.**
- 1243 67. Simola DF, Graham RJ, Brady CM, Enzmann BL, Desplan C, Ray A, Zwiebel LJ, Bonasio  
1244 R, Reinberg D, Liebig J *et al*: **Epigenetic (re)programming of caste-specific behavior**  
1245 **in the ant *Camponotus floridanus*.** *Science* 2016, **351(6268):aac6633.**
- 1246 68. Kay J, Menegazzi P, Mildner S, Roces F, Helfrich-Förster C: **The circadian clock of the**  
1247 **ant *Camponotus floridanus* is localized in dorsal and lateral neurons of the brain.**  
1248 *Journal of biological rhythms* 2018, **33(3):255-271.**
- 1249 69. LeBoeuf AC, Cohan AB, Stoffel C, Brent CS, Waridel P, Privman E, Keller L, Benton  
1250 R: **Molecular evolution of juvenile hormone esterase-like proteins in a socially**  
1251 **exchanged fluid.** *Sci Rep* 2018, **8(1):17830.**
- 1252 70. Shields EJ, Sheng L, Weiner AK, Garcia BA, Bonasio R: **High-Quality Genome**  
1253 **Assemblies Reveal Long Non-coding RNAs Expressed in Ant Brains.** *Cell Rep* 2018,  
1254 **23(10):3078-3090.**
- 1255 71. Will I, Das B, Trinh T, Brachmann A, Ohm RA, de Bekker C: **Genetic Underpinnings of**  
1256 **Host Manipulation by *Ophiocordyceps* as Revealed by**



- 1257 **Comparative Transcriptomics. G3: Genes/Genomes/Genetics**  
1258 2020:g3.401290.402020.
- 1259 72. Ferguson ST, Park KY, Ruff AA, Bakis I, Zwiebel LJ: **Odor coding of nestmate**  
1260 **recognition in the eusocial ant *Camponotus floridanus*.** *Journal of Experimental*  
1261 *Biology* 2020.
- 1262 73. LeBoeuf AC, Waridel P, Brent CS, Gonçalves AN, Menin L, Ortiz D, Riba-Grognuz O,  
1263 Koto A, Soares ZG, Privman E: **Oral transfer of chemical cues, growth proteins and**  
1264 **hormones in social insects.** *Elife* 2016, **5**:e20375.
- 1265 74. Rösch A, Schmidbauer H: **WaveletComp 1.1: A guided tour through the R package.**  
1266 *URL: [http://www.hsstat.com/projects/WaveletComp/WaveletComp\\_guided\\_tour.pdf](http://www.hsstat.com/projects/WaveletComp/WaveletComp_guided_tour.pdf)*  
1267 2016.
- 1268 75. Mikheyev AS, Linksvayer TA: **Genes associated with ant social behavior show**  
1269 **distinct transcriptional and evolutionary patterns.** *Elife* 2015, **4**:e04775.
- 1270 76. Hutchison AL, Maisenschein-Cline M, Chiang AH, Tabei SM, Gudjonson H, Bahroos N,  
1271 Allada R, Dinner AR: **Improved statistical methods enable greater sensitivity in**  
1272 **rhythm detection for genome-wide data.** *PLoS Comput Biol* 2015, **11**(3):e1004094.
- 1273 77. Hutchison AL, Allada R, Dinner AR: **Bootstrapping and Empirical Bayes Methods**  
1274 **Improve Rhythm Detection in Sparsely Sampled Data.** *J Biol Rhythms* 2018,  
1275 **33**(4):339-349.
- 1276 78. McArthur AJ, Hunt AE, Gillette MU: **Melatonin Action and Signal Transduction in the**  
1277 **Rat Suprachiasmatic Circadian Clock: Activation of Protein Kinase C at Dusk and**  
1278 **Dawn\*.** *Endocrinology* 1997, **138**(2):627-634.
- 1279 79. Benloucif S, Dubocovich ML: **Melatonin and Light Induce Phase Shifts of Circadian**  
1280 **Activity Rhythms in the C3H/HeN Mouse.** *Journal of Biological Rhythms* 1996,  
1281 **11**(2):113-125.
- 1282 80. Yasuo S, Yoshimura T, Ebihara S, Korf H-W: **Melatonin Transmits Photoperiodic**  
1283 **Signals through the MT1 Melatonin Receptor.** *The Journal of Neuroscience* 2009,  
1284 **29**(9):2885.
- 1285 81. Sancar C, Sancar G, Ha N, Cesbron F, Brunner M: **Dawn- and dusk-phased circadian**  
1286 **transcription rhythms coordinate anabolic and catabolic functions in *Neurospora*.**  
1287 *BMC Biology* 2015, **13**(1):17.
- 1288 82. Bloch G, Barnes BM, Gerkema MP, Helm B: **Animal activity around the clock with no**  
1289 **overt circadian rhythms: patterns, mechanisms and adaptive value.** *Proc Biol Sci*  
1290 2013, **280**(1765):20130019.
- 1291 83. Senthilan Pingkalai R, Piepenbrock D, Ovezmyradov G, Nadrowski B, Bechstedt S,  
1292 Pauls S, Winkler M, Möbius W, Howard J, Göpfert Martin C: **Drosophila Auditory**  
1293 **Organ Genes and Genetic Hearing Defects.** *Cell* 2012, **150**(5):1042-1054.
- 1294 84. Sokabe T, Chen H-C, Luo J, Montell C: **A switch in thermal preference in *Drosophila***  
1295 **larvae depends on multiple rhodopsins.** *Cell reports* 2016, **17**(2):336-344.
- 1296 85. Leung NY, Montell C: **Unconventional roles of opsins.** *Annual review of cell and*  
1297 *developmental biology* 2017, **33**:241-264.
- 1298 86. Kirchner W: **Acoustical communication in honeybees.** *Apidologie* 1993, **24**(3):297-  
1299 307.
- 1300 87. Kirchner W: **Acoustical communication in social insects.** In: *Orientation and*  
1301 *communication in arthropods.* Springer; 1997: 273-300.

- 1302 88. Fuchs S: **An informational analysis of the alarm communication by drumming**  
1303 **behavior in nests of carpenter ants (*Camponotus*, Formicidae, Hymenoptera).**  
1304 *Behavioral Ecology and Sociobiology* 1976, **1**(3):315-336.
- 1305 89. Fuchs S: **The response to vibrations of the substrate and reactions to the specific**  
1306 **drumming in colonies of carpenter ants (*Camponotus*, Formicidae, Hymenoptera).**  
1307 *Behavioral Ecology and Sociobiology* 1976, **1**(2):155-184.
- 1308 90. Lin J-M, Kilman VL, Keegan K, Paddock B, Emery-Le M, Rosbash M, Allada R: **A role**  
1309 **for casein kinase 2 $\alpha$  in the *Drosophila* circadian clock.** *Nature* 2002, **420**(6917):816-  
1310 820.
- 1311 91. Lin J-M, Schroeder A, Allada R: **In vivo circadian function of casein kinase 2**  
1312 **phosphorylation sites in *Drosophila* PERIOD.** *Journal of Neuroscience* 2005,  
1313 **25**(48):11175-11183.
- 1314 92. Szabó Á, Papin C, Zorn D, Ponien P, Weber F, Raabe T, Rouyer F: **The CK2 kinase**  
1315 **stabilizes CLOCK and represses its activity in the *Drosophila* circadian oscillator.**  
1316 *PLoS Biol* 2013, **11**(8):e1001645.
- 1317 93. Top D, Harms E, Syed S, Adams EL, Saez L: **GSK-3 and CK2 kinases converge on**  
1318 **timeless to regulate the master clock.** *Cell reports* 2016, **16**(2):357-367.
- 1319 94. Ananthasubramaniam B, Diernfellner A, Brunner M, Herzog H: **Ultradian Rhythms in**  
1320 **the Transcriptome of *Neurospora crassa*.** *iScience* 2018, **9**:475-486.
- 1321 95. Biscontin A, Martini P, Costa R, Kramer A, Meyer B, Kawaguchi S, Teschke M, De Pittà  
1322 C: **Analysis of the circadian transcriptome of the Antarctic krill *Euphausia superba*.**  
1323 *Sci Rep-Uk* 2019, **9**(1):1-11.
- 1324 96. Connor KM, Gracey AY: **Circadian cycles are the dominant transcriptional rhythm in**  
1325 **the intertidal mussel *Mytilus californianus*.** *Proceedings of the National Academy of*  
1326 *Sciences* 2011, **108**(38):16110-16115.
- 1327 97. Hughes ME, DiTacchio L, Hayes KR, Vollmers C, Pulivarthy S, Baggs JE, Panda S,  
1328 Hogenesch JB: **Harmonics of circadian gene transcription in mammals.** *PLoS Genet*  
1329 2009, **5**(4):e1000442.
- 1330 98. Payton L, Perrigault M, Hoede C, Massabuau J-C, Sow M, Huvet A, Bouillot F, Fabioux  
1331 C, Hegaret H, Tran D: **Remodeling of the cycling transcriptome of the oyster**  
1332 ***Crassostrea gigas* by the harmful algae *Alexandrium minutum*.** *Sci Rep-Uk* 2017,  
1333 **7**(1):1-14.
- 1334 99. Satoh A, Terai Y: **Circatidal gene expression in the mangrove cricket**  
1335 ***Apteronomobius asahinai*.** *Sci Rep-Uk* 2019, **9**(1):1-7.
- 1336 100. Schnytzer Y, Simon-Blecher N, Li J, Ben-Asher HW, Salmon-Divon M, Achituv Y,  
1337 Hughes M, Levy O: **Tidal and diel orchestration of behaviour and gene expression in**  
1338 **an intertidal mollusc.** *Sci Rep-Uk* 2018, **8**(1):1-13.
- 1339 101. Payton L, Hüppe L, Noirot C, Hoede C, Last KS, Wilcockson D, Ershova E, Valière S,  
1340 Meyer B: **Widely rhythmic transcriptome in *Calanus finmarchicus***  
1341 **during the high Arctic summer solstice period.** *iScience* 2021, **24**(1).
- 1342 102. Toma DP, Bloch G, Moore D, Robinson GE: **Changes in period mRNA levels in the**  
1343 **brain and division of labor in honey bee colonies.** *Proceedings of the National*  
1344 *Academy of Sciences* 2000, **97**(12):6914-6919.
- 1345 103. Abruzzi KC, Rodriguez J, Menet JS, Desrochers J, Zadina A, Luo W, Tkachev S, Rosbash  
1346 M: ***Drosophila* CLOCK target gene characterization: implications for circadian**  
1347 **tissue-specific gene expression.** *Genes & development* 2011, **25**(22):2374-2386.

- 1348 104. Martinek S, Inonog S, Manoukian AS, Young MW: **A role for the segment polarity**  
1349 **gene shaggy/GSK-3 in the Drosophila circadian clock.** *Cell* 2001, **105**(6):769-779.
- 1350 105. Ko HW, Kim EY, Chiu J, Vanselow JT, Kramer A, Edery I: **A Hierarchical**  
1351 **Phosphorylation Cascade That Regulates the Timing of PERIOD Nuclear Entry**  
1352 **Reveals Novel Roles for Proline-Directed Kinases and GSK-3 $\beta$ /SGG in Circadian**  
1353 **Clocks.** *The Journal of Neuroscience* 2010, **30**(38):12664.
- 1354 106. Kloss B, Price JL, Saez L, Blau J, Rothenfluh A, Wesley CS, Young MW: **The Drosophila**  
1355 **clock gene double-time encodes a protein closely related to human casein kinase**  
1356 **I $\epsilon$ .** *Cell* 1998, **94**(1):97-107.
- 1357 107. Price JL, Blau J, Rothenfluh A, Abodeely M, Kloss B, Young MW: **double-time is a**  
1358 **novel Drosophila clock gene that regulates PERIOD protein accumulation.** *Cell*  
1359 1998, **94**(1):83-95.
- 1360 108. Cyran SA, Yiannoulos G, Buchsbaum AM, Saez L, Young MW, Blau J: **The Double-**  
1361 **Time Protein Kinase Regulates the Subcellular Localization of the**  
1362 **&lt;em>Drosophila</em> Clock Protein Period.** *The Journal of*  
1363 *Neuroscience* 2005, **25**(22):5430.
- 1364 109. Chiu Joanna C, Ko Hyuk W, Edery I: **NEMO/NLK Phosphorylates PERIOD to Initiate a**  
1365 **Time-Delay Phosphorylation Circuit that Sets Circadian Clock Speed.** *Cell* 2011,  
1366 **145**(3):357-370.
- 1367 110. Akten B, Jauch E, Genova GK, Kim EY, Edery I, Raabe T, Jackson FR: **A role for CK2 in**  
1368 **the Drosophila circadian oscillator.** *Nature Neuroscience* 2003, **6**(3):251-257.
- 1369 111. Li Y, Guo F, Shen J, Rosbash M: **PDF and cAMP enhance PER stability in Drosophila**  
1370 **clock neurons.** *Proceedings of the National Academy of Sciences* 2014,  
1371 **111**(13):E1284-E1290.
- 1372 112. Fang Y, Sathyanarayanan S, Sehgal A: **Post-translational regulation of the**  
1373 **Drosophila circadian clock requires protein phosphatase 1 (PP1).** *Genes &*  
1374 *development* 2007, **21**(12):1506-1518.
- 1375 113. Sathyanarayanan S, Zheng X, Xiao R, Sehgal A: **Posttranslational regulation of**  
1376 **Drosophila PERIOD protein by protein phosphatase 2A.** *Cell* 2004, **116**(4):603-615.
- 1377 114. Huang Y, Ainsley JA, Reijmers LG, Jackson FR: **Translational Profiling of Clock Cells**  
1378 **Reveals Circadianly Synchronized Protein Synthesis.** *PLOS Biology* 2013,  
1379 **11**(11):e1001703.
- 1380 115. Li S, Shui K, Zhang Y, Lv Y, Deng W, Ullah S, Zhang L, Xue Y: **CGDB: a database of**  
1381 **circadian genes in eukaryotes.** *Nucleic Acids Research* 2016:gkw1028.
- 1382 116. Shapiro RA, Wakimoto BT, Subers EM, Nathanson NM: **Characterization and**  
1383 **functional expression in mammalian cells of genomic and cDNA clones encoding a**  
1384 **Drosophila muscarinic acetylcholine receptor.** *Proceedings of the National Academy*  
1385 *of Sciences* 1989, **86**(22):9039.
- 1386 117. Harrison JB, Chen HH, Blake AD, Huskisson NS, Barker P, Sattelle DB: **Localization in**  
1387 **the Nervous System of Drosophila Melanogaster of a C-Terminus Anti-Peptide**  
1388 **Antibody to a Cloned Drosophila Muscarinic Acetylcholine Receptor.** *Journal of*  
1389 *Neuroendocrinology* 1995, **7**(5):347-352.
- 1390 118. Inagaki HK, Panse KM, Anderson DJ: **Independent, reciprocal neuromodulatory**  
1391 **control of sweet and bitter taste sensitivity during starvation in Drosophila.** *Neuron*  
1392 2014, **84**(4):806-820.

- 1393 119. Petrucelli E, Li Q, Rao Y, Kitamoto T: **The Unique Dopamine/Ecdysteroid Receptor**  
1394 **Modulates Ethanol-Induced Sedation in *Drosophila***. *J Neurosci* 2016, **36**(16):4647-  
1395 4657.
- 1396 120. Abrieux A, Duportets L, Debernard S, Gadenne C, Anton S: **The GPCR membrane**  
1397 **receptor, DopEcR, mediates the actions of both dopamine and ecdysone to control**  
1398 **sex pheromone perception in an insect**. *Front Behav Neurosci* 2014, **8**:312-312.
- 1399 121. Kang X-L, Zhang J-Y, Wang D, Zhao Y-M, Han X-L, Wang J-X, Zhao X-F: **The steroid**  
1400 **hormone 20-hydroxyecdysone binds to dopamine receptor to repress lepidopteran**  
1401 **insect feeding and promote pupation**. *PLoS Genetics* 2019, **15**(8):e1008331.
- 1402 122. Kamhi JF, Traniello JF: **Biogenic amines and collective organization in a**  
1403 **superorganism: neuromodulation of social behavior in ants**. *Brain, behavior and*  
1404 *evolution* 2013, **82**(4):220-236.
- 1405 123. Friedman DA, Gordon DM: **Ant Genetics: Reproductive Physiology, Worker**  
1406 **Morphology, and Behavior**. *Annu Rev Neurosci* 2016, **39**:41-56.
- 1407 124. Beninger RJ: **The role of dopamine in locomotor activity and learning**. *Brain*  
1408 *Research Reviews* 1983, **6**(2):173-196.
- 1409 125. Grippio RM, Güler AD: **Focus: Clocks and Cycles: Dopamine Signaling in Circadian**  
1410 **Photoentrainment: Consequences of Desynchrony**. *The Yale journal of biology and*  
1411 *medicine* 2019, **92**(2):271.
- 1412 126. Liang X, Ho MC, Zhang Y, Li Y, Wu MN, Holy TE, Taghert PH: **Morning and evening**  
1413 **circadian pacemakers independently drive premotor centers via a specific**  
1414 **dopamine relay**. *Neuron* 2019, **102**(4):843-857. e844.
- 1415 127. Blum ID, Zhu L, Moquin L, Kokoeva MV, Gratton A, Giros B, Storch K-F: **A highly**  
1416 **tunable dopaminergic oscillator generates ultradian rhythms of behavioral arousal**.  
1417 *Elife* 2014, **3**:e05105.
- 1418 128. Rocas F: **Variable thermal sensitivity as output of a circadian clock controlling the**  
1419 **bimodal rhythm of temperature choice in the ant *Camponotus mus***. *Journal of*  
1420 *Comparative Physiology A* 1995, **177**(5):637-643.
- 1421 129. Rocas F, Nunez JA: **A circadian rhythm of thermal preference in the ant**  
1422 ***Camponotus mus*: masking and entrainment by temperature cycles**. *Physiol*  
1423 *Entomol* 1996, **21**(2):138-142.
- 1424 130. Yuan Q, Metterville D, Briscoe AD, Reppert SM: **Insect cryptochromes: gene**  
1425 **duplication and loss define diverse ways to construct insect circadian clocks**. *Mol*  
1426 *Biol Evol* 2007, **24**(4):948-955.
- 1427 131. Rubin EB, Shemesh Y, Cohen M, Elgavish S, Robertson HM, Bloch G: **Molecular and**  
1428 **phylogenetic analyses reveal mammalian-like clockwork in the honey bee (*Apis***  
1429 ***mellifera*) and shed new light on the molecular evolution of the circadian clock**.  
1430 *Genome Research* 2006, **16**(11):1352-1365.
- 1431 132. Yang L, Qin Y, Li X, Song D, Qi M: **Brain melatonin content and polyethism in adult**  
1432 **workers of *Apis mellifera* and *Apis cerana* (Hym., Apidae)**. *Journal of Applied*  
1433 *Entomology* 2007, **131**(9-10):734-739.
- 1434 133. Ingram KK, Oefner P, Gordon DM: **Task-specific expression of the foraging gene in**  
1435 **harvester ants**. *Molecular Ecology* 2005, **14**(3):813-818.
- 1436 134. Ingram KK, Kleeman L, Peteru S: **Differential regulation of the foraging gene**  
1437 **associated with task behaviors in harvester ants**. *BMC Ecology* 2011, **11**(1):19.
- 1438 135. Anreiter I, Sokolowski MB: **The foraging Gene and Its Behavioral Effects: Pleiotropy**  
1439 **and Plasticity**. *Annual Review of Genetics* 2019, **53**(1):373-392.

- 1440 136. Ceriani MF, Hogenesch JB, Yanovsky M, Panda S, Straume M, Kay SA: **Genome-Wide**  
1441 **Expression Analysis in *Drosophila* Reveals Genes Controlling**  
1442 **Circadian Behavior.** *The Journal of Neuroscience* 2002, **22**(21):9305.
- 1443 137. Fernández MdP, Chu J, Vilella A, Atkinson N, Kay SA, Ceriani MF: **Impaired clock**  
1444 **output by altered connectivity in the circadian network.** *Proceedings of the*  
1445 *National Academy of Sciences* 2007, **104**(13):5650.
- 1446 138. Helfrich-Förster C: **The period clock gene is expressed in central nervous system**  
1447 **neurons which also produce a neuropeptide that reveals the projections of**  
1448 **circadian pacemaker cells within the brain of *Drosophila melanogaster*.**  
1449 *Proceedings of the National Academy of Sciences* 1995, **92**(2):612-616.
- 1450 139. Helfrich-Förster C: **Robust circadian rhythmicity of *Drosophila melanogaster***  
1451 **requires the presence of lateral neurons: a brain-behavioral study of disconnected**  
1452 **mutants.** *Journal of Comparative Physiology A* 1998, **182**(4):435-453.
- 1453 140. Renn SCP, Park JH, Rosbash M, Hall JC, Taghert PH: **A pdf Neuropeptide Gene**  
1454 **Mutation and Ablation of PDF Neurons Each Cause Severe Abnormalities of**  
1455 **Behavioral Circadian Rhythms in *Drosophila*.** *Cell* 1999, **99**(7):791-802.
- 1456 141. Stoleru D, Peng Y, Agosto J, Rosbash M: **Coupled oscillators control morning and**  
1457 **evening locomotor behaviour of *Drosophila*.** *Nature* 2004, **431**(7010):862-868.
- 1458 142. Majercak J, Kalderon D, Edery I: ***Drosophila melanogaster* deficient in protein kinase**  
1459 **A manifests behavior-specific arrhythmia but normal clock function.** *Molecular and*  
1460 *Cellular Biology* 1997, **17**(10):5915.
- 1461 143. Petri B, Stengl M: **Pigment-dispersing hormone shifts the phase of the circadian**  
1462 **pacemaker of the cockroach *Leucophaea maderae*.** *Journal of Neuroscience* 1997,  
1463 **17**(11):4087-4093.
- 1464 144. Peng Y, Stoleru D, Levine JD, Hall JC, Rosbash M: ***Drosophila* free-running rhythms**  
1465 **require intercellular communication.** *PLoS Biol* 2003, **1**(1):e13.
- 1466 145. Saifullah A, Tomioka K: **Pigment-dispersing factor sets the night state of the**  
1467 **medulla bilateral neurons in the optic lobe of the cricket, *Gryllus bimaculatus*.**  
1468 *Journal of insect physiology* 2003, **49**(3):231-239.
- 1469 146. Singaravel M, Fujisawa Y, Hisada M, Saifullah A, Tomioka K: **Phase shifts of the**  
1470 **circadian locomotor rhythm induced by pigment-dispersing factor in the cricket**  
1471 ***Gryllus bimaculatus*.** *Zoological science* 2003, **20**(11):1347-1354.
- 1472 147. Lin Y, Stormo GD, Taghert PH: **The neuropeptide pigment-dispersing factor**  
1473 **coordinates pacemaker interactions in the *Drosophila* circadian system.** *Journal of*  
1474 *Neuroscience* 2004, **24**(36):7951-7957.
- 1475 148. Yoshii T, Wülbeck C, Sehadova H, Veleri S, Bichler D, Stanewsky R, Helfrich-Förster C:  
1476 **The neuropeptide pigment-dispersing factor adjusts period and phase of**  
1477 ***Drosophila*'s clock.** *Journal of Neuroscience* 2009, **29**(8):2597-2610.
- 1478 149. Schendzielorz J, Schendzielorz T, Arendt A, Stengl M: **Bimodal oscillations of cyclic**  
1479 **nucleotide concentrations in the circadian system of the Madeira cockroach**  
1480 ***Rhyarobia maderae*.** *Journal of biological rhythms* 2014, **29**(5):318-331.
- 1481 150. Liang X, Holy TE, Taghert PH: **Synchronous *Drosophila* circadian pacemakers display**  
1482 **nonsynchronous Ca<sup>2+</sup> rhythms in vivo.** *Science* 2016, **351**(6276):976-981.
- 1483 151. Liang X, Holy TE, Taghert PH: **A series of suppressive signals within the *Drosophila***  
1484 **circadian neural circuit generates sequential daily outputs.** *Neuron* 2017,  
1485 **94**(6):1173-1189. e1174.

- 1486 152. Helfrich-Förster C, Homberg U: **Pigment-dispersing hormone-immunoreactive**  
1487 **neurons in the nervous system of wild-type *Drosophila melanogaster* and of**  
1488 **several mutants with altered circadian rhythmicity.** *Journal of Comparative*  
1489 *Neurology* 1993, **337**(2):177-190.
- 1490 153. Beer K, Kolbe E, Kahana NB, Yayon N, Weiss R, Menegazzi P, Bloch G, Helfrich-Förster  
1491 C: **Pigment-Dispersing Factor-expressing neurons convey circadian information in**  
1492 **the honey bee brain.** *Open Biology*, **8**(1):170224.
- 1493 154. Fuchikawa T, Beer K, Linke-Winnebeck C, Ben-David R, Kotowoy A, Tsang V, Warman  
1494 G, Winnebeck E, Helfrich-Förster C, Bloch G: **Neuronal circadian clock protein**  
1495 **oscillations are similar in behaviourally rhythmic forager honeybees and in**  
1496 **arrhythmic nurses.** *Open biology* 2017, **7**(6):170047.
- 1497 155. Robinson GE, Grozinger CM, Whitfield CW: **Sociogenomics: social life in molecular**  
1498 **terms.** *Nature Reviews Genetics* 2005, **6**(4):257-270.
- 1499 156. Ament SA, Corona M, Pollock HS, Robinson GE: **Insulin signaling is involved in the**  
1500 **regulation of worker division of labor in honey bee colonies.** *Proceedings of the*  
1501 *National Academy of Sciences* 2008, **105**(11):4226.
- 1502 157. Alaux C, Sinha S, Hasadsri L, Hunt GJ, Guzmán-Novoa E, DeGrandi-Hoffman G, Uribe-  
1503 Rubio JL, Southey BR, Rodriguez-Zas S, Robinson GE: **Honey bee aggression supports**  
1504 **a link between gene regulation and behavioral evolution.** *Proceedings of the*  
1505 *National Academy of Sciences* 2009, **106**(36):15400.
- 1506 158. Chandrasekaran S, Ament SA, Eddy JA, Rodriguez-Zas SL, Schatz BR, Price ND,  
1507 Robinson GE: **Behavior-specific changes in transcriptional modules lead to distinct**  
1508 **and predictable neurogenomic states.** *Proceedings of the National Academy of*  
1509 *Sciences* 2011, **108**(44):18020.
- 1510 159. Manfredini F, Lucas C, Nicolas M, Keller L, Shoemaker D, Grozinger CM: **Molecular**  
1511 **and social regulation of worker division of labour in fire ants.** *Molecular Ecology*  
1512 2014, **23**(3):660-672.
- 1513 160. Erion R, Sehgal A: **Regulation of insect behavior via the insulin-signaling pathway.**  
1514 *Frontiers in physiology* 2013, **4**:353.
- 1515 161. Kohlmeier P, Alleman AR, Libbrecht R, Foitzik S, Feldmeyer B: **Gene expression is**  
1516 **more strongly associated with behavioural specialization than with age or fertility**  
1517 **in ant workers.** *Molecular Ecology* 2019, **28**(3):658-670.
- 1518 162. Von Wychetzkki K, Rueppell O, Oettler J, Heinze J: **Transcriptomic signatures mirror**  
1519 **the lack of the fecundity/longevity trade-off in ant queens.** *Molecular biology and*  
1520 *evolution* 2015, **32**(12):3173-3185.
- 1521 163. Oettler J, Schrempf A: **Fitness and aging in *Cardiocondyla obscurior* ant queens.**  
1522 *Current opinion in insect science* 2016, **16**:58-63.
- 1523 164. Caplin B, Wang Z, Slaviero A, Tomlinson J, Dowsett L, Delahaye M, Salama A, null n,  
1524 Wheeler David C, Leiper J: **Alanine-Glyoxylate Aminotransferase-2 Metabolizes**  
1525 **Endogenous Methylarginines, Regulates NO, and Controls Blood Pressure.**  
1526 *Arteriosclerosis, Thrombosis, and Vascular Biology* 2012, **32**(12):2892-2900.
- 1527 165. Kozlov A, Koch R, Nagoshi E: **Nitric oxide mediates neuro-glial interaction that**  
1528 **shapes *Drosophila* circadian behavior.** *PLOS Genetics* 2020, **16**(6):e1008312.
- 1529 166. Artiushin G, Sehgal A: **The Glial Perspective on Sleep and Circadian Rhythms.** *Annual*  
1530 *Review of Neuroscience* 2020, **43**(1):119-140.

- 1531 167. Chiang A-S, Lin W-Y, Liu H-P, Pszczolkowski MA, Fu T-F, Chiu S-L, Holbrook GL: **Insect**  
1532 **NMDA receptors mediate juvenile hormone biosynthesis.** *Proceedings of the*  
1533 *National Academy of Sciences* 2002, **99**(1):37-42.
- 1534 168. Yang JH, Wada A, Yoshida K, Miyoshi Y, Sayano T, Esaki K, Kinoshita MO, Tomonaga  
1535 S, Azuma N, Watanabe M *et al*: **Brain-specific Phgdh Deletion Reveals a Pivotal Role**  
1536 **for l-Serine Biosynthesis in Controlling the Level of d-Serine, an N-methyl-d-**  
1537 **aspartate Receptor Co-agonist, in Adult Brain\***. *Journal of Biological Chemistry*  
1538 2010, **285**(53):41380-41390.
- 1539 169. Klomp LWJ, de Koning TJ, Malingré HEM, van Beurden EACM, Brink M, Opdam FL,  
1540 Duran M, Jaeken J, Pineda M, van Maldergem L *et al*: **Molecular Characterization of**  
1541 **3-Phosphoglycerate Dehydrogenase Deficiency—a Neurometabolic Disorder**  
1542 **Associated with Reduced L-Serine Biosynthesis.** *The American Journal of Human*  
1543 *Genetics* 2000, **67**(6):1389-1399.
- 1544 170. Cull-Candy S, Brickley S, Farrant M: **NMDA receptor subunits: diversity,**  
1545 **development and disease.** *Current Opinion in Neurobiology* 2001, **11**(3):327-335.
- 1546 171. Scheetz AJ, Constantine-Paton M: **Modulation of NMDA receptor function:**  
1547 **implications for vertebrate neural development.** *The FASEB Journal* 1994,  
1548 **8**(10):745-752.
- 1549 172. Nakazawa K, McHugh TJ, Wilson MA, Tonegawa S: **NMDA receptors, place cells and**  
1550 **hippocampal spatial memory.** *Nature Reviews Neuroscience* 2004, **5**(5):361-372.
- 1551 173. Kamita SG, Hinton AC, Wheelock CE, Wogulis MD, Wilson DK, Wolf NM, Stok JE, Hock  
1552 B, Hammock BD: **Juvenile hormone (JH) esterase: why are you so JH specific?** *Insect*  
1553 *Biochemistry and Molecular Biology* 2003, **33**(12):1261-1273.
- 1554 174. Rehan SM, Glastad KM, Steffen MA, Fay CR, Hunt BG, Toth AL: **Conserved genes**  
1555 **underlie phenotypic plasticity in an incipiently social bee.** *Genome biology and*  
1556 *evolution* 2018, **10**(10):2749-2758.
- 1557 175. Liang ZS, Mattila HR, Rodriguez-Zas SL, Southey BR, Seeley TD, Robinson GE:  
1558 **Comparative brain transcriptomic analyses of scouting across distinct behavioural**  
1559 **and ecological contexts in honeybees.** *Proceedings of the Royal Society B: Biological*  
1560 *Sciences* 2014, **281**(1797):20141868.
- 1561 176. Koch SI, Groh K, Vogel H, Hannson BS, Kleineidam CJ, Grosse-Wilde E: **Caste-specific**  
1562 **expression patterns of immune response and chemosensory related genes in the**  
1563 **leaf-cutting ant, *Atta vollenweideri*.** *PLoS one* 2013, **8**(11):e81518.
- 1564 177. Xiao L, Priest MF, Nasenbeny J, Lu T, Kozorovitskiy Y: **Biased oxytocinergic**  
1565 **modulation of midbrain dopamine systems.** *Neuron* 2017, **95**(2):368-384. e365.
- 1566 178. O'Rourke T, Boeckx C: **Converging roles of glutamate receptors in domestication**  
1567 **and prosociality.** *bioRxiv* 2018:439869.
- 1568 179. Purrier N, Engeland WC, Kofuji P: **Mice Deficient of Glutamatergic Signaling from**  
1569 **Intrinsically Photosensitive Retinal Ganglion Cells Exhibit Abnormal Circadian**  
1570 **Photoentrainment.** *PLOS ONE* 2014, **9**(10):e111449.
- 1571 180. Azevedo RVDMD, Hansen C, Chen K-F, Rosato E, Kyriacou CP: **Disrupted Glutamate**  
1572 **Signaling in *Drosophila* Generates Locomotor Rhythms in Constant Light.** *Frontiers*  
1573 *in Physiology* 2020, **11**(145).
- 1574 181. Stenesen D, Moehlman AT, Krämer H: **The carcinine transporter CarT is required in**  
1575 ***Drosophila* photoreceptor neurons to sustain histamine recycling.** *eLife* 2015,  
1576 **4**:e10972.

- 1577 182. Hardie RC: **Is histamine a neurotransmitter in insect photoreceptors?** *Journal of*  
1578 *Comparative Physiology A* 1987, **161**(2):201-213.
- 1579 183. Hardie RC: **A histamine-activated chloride channel involved in neurotransmission at**  
1580 **a photoreceptor synapse.** *Nature* 1989, **339**(6227):704-706.
- 1581 184. Shinomiya K, Huang G, Lu Z, Parag T, Xu CS, Aniceto R, Ansari N, Cheatham N,  
1582 Lauchie S, Neace E: **Comparisons between the ON-and OFF-edge motion pathways**  
1583 **in the *Drosophila* brain.** *Elife* 2019, **8**:e40025.
- 1584 185. Muraro NI, Ceriani MF: **Acetylcholine from visual circuits modulates the activity of**  
1585 **arousal neurons in *Drosophila*.** *Journal of Neuroscience* 2015, **35**(50):16315-16327.
- 1586 186. Kirszenblat L, Yaun R, van Swinderen B: **Visual experience drives sleep need in**  
1587 ***Drosophila*.** *Sleep* 2019, **42**(7):zsz102.
- 1588 187. Borst A, Haag J, Mauss AS: **How fly neurons compute the direction of visual motion.**  
1589 *Journal of Comparative Physiology A* 2020, **206**(2):109-124.
- 1590 188. Warner MR, Qiu L, Holmes MJ, Mikheyev AS, Linksvayer TA: **Convergent eusocial**  
1591 **evolution is based on a shared reproductive groundplan plus lineage-specific**  
1592 **plastic genes.** *Nature communications* 2019, **10**(1):1-11.
- 1593 189. Amdam GV, Norberg K, Hagen A, Omholt SW: **Social exploitation of vitellogenin.**  
1594 *Proceedings of the National Academy of Sciences* 2003, **100**(4):1799.
- 1595 190. Antonio DSM, Guidugli-Lazzarini KR, Do Nascimento AM, Simões ZLP, Hartfelder K:  
1596 **RNAi-mediated silencing of vitellogenin gene function turns honeybee (*Apis***  
1597 **mellifera) workers into extremely precocious foragers.** *Naturwissenschaften* 2008,  
1598 **95**(10):953-961.
- 1599 191. Hawkings C, Calkins TL, Pietrantonio PV, Tamborindeguy C: **Caste-based differential**  
1600 **transcriptional expression of hexamerins in response to a juvenile hormone analog**  
1601 **in the red imported fire ant (*Solenopsis invicta*).** *PLOS ONE* 2019, **14**(5):e0216800.
- 1602 192. Meurville M-P, LeBoeuf AC: **Trophallaxis: the functions and evolution of social fluid**  
1603 **exchange in ant colonies (Hymenoptera: Formicidae).** *Myrmecological News* 2021,  
1604 **31**.
- 1605 193. Norman VC, Hughes WO: **Behavioural effects of juvenile hormone and their**  
1606 **influence on division of labour in leaf-cutting ant societies.** *Journal of Experimental*  
1607 *Biology* 2016, **219**(1):8-11.
- 1608 194. Robinson GE: **Effects of a juvenile hormone analogue on honey bee foraging**  
1609 **behaviour and alarm pheromone production.** *Journal of Insect Physiology* 1985,  
1610 **31**(4):277-282.
- 1611 195. Robinson GE, Vargo EL: **Juvenile hormone in adult eusocial Hymenoptera:**  
1612 **gonadotropin and behavioral pacemaker.** *Archives of Insect Biochemistry and*  
1613 *Physiology: Published in Collaboration with the Entomological Society of America*  
1614 1997, **35**(4):559-583.
- 1615 196. Li J, Grant GR, Hogenesch JB, Hughes ME: **Considerations for RNA-seq analysis of**  
1616 **circadian rhythms.** In: *Methods in enzymology.* vol. 551: Elsevier; 2015: 349-367.
- 1617 197. Li J, Grant GR, Hogenesch JB, Hughes ME: **Considerations for RNA-seq analysis of**  
1618 **circadian rhythms.** *Methods Enzymol* 2015, **551**:349-367.
- 1619 198. de Bekker C, Bruning O, Jonker MJ, Breit TM, Wösten HA: **Single cell transcriptomics**  
1620 **of neighboring hyphae of *Aspergillus niger*.** *Genome biology* 2011, **12**(8):R71.
- 1621 199. Bushnell B: **BBMap short-read aligner, and other bioinformatics tools.** 2016. In.:  
1622 Available; 2018.



- 1623 200. Kim D, Langmead B, Salzberg S: **HISAT2: graph-based alignment of next-generation**  
1624 **sequencing reads to a population of genomes**. In.; 2017.
- 1625 201. Shields EJ, Sheng L, Weiner AK, Garcia BA, Bonasio R: **High-quality genome**  
1626 **assemblies reveal long non-coding RNAs expressed in ant brains**. *Cell reports* 2018,  
1627 **23(10):3078-3090**.
- 1628 202. Trapnell C, Roberts A, Goff L, Pertea G, Kim D, Kelley DR, Pimentel H, Salzberg SL,  
1629 Rinn JL, Pachter L: **Differential gene and transcript expression analysis of RNA-seq**  
1630 **experiments with TopHat and Cufflinks**. *Nature protocols* 2012, **7(3):562-578**.
- 1631 203. Singer JM, Hughey JJ: **LimoRhyde: A Flexible Approach for Differential Analysis of**  
1632 **Rhythmic Transcriptome Data**. *J Biol Rhythms* 2019, **34(1):5-18**.
- 1633 204. Romanowski A, Garavaglia MJ, Goya ME, Ghiringhelli PD, Golombek DA: **Potential**  
1634 **conservation of circadian clock proteins in the phylum Nematoda as revealed by**  
1635 **bioinformatic searches**. *PLoS One* 2014, **9(11):e112871**.
- 1636 205. Eddy SR: **Accelerated profile HMM searches**. *PLoS computational biology* 2011,  
1637 **7(10)**.
- 1638 206. Lechner M, Findeiß S, Steiner L, Marz M, Stadler PF, Prohaska SJ: **Proteinortho:**  
1639 **detection of (co-) orthologs in large-scale analysis**. *BMC bioinformatics* 2011,  
1640 **12(1):124**.
- 1641 207. Team R: **RStudio: Integrated development for R [Computer software]**. URL  
1642 <http://www.rstudio.com/> Boston, MA: RStudio, Inc 2016.
- 1643 208. Team RC: **R: A language and environment for statistical computing**. 2013.
- 1644 209. Kolde R: **Pheatmap: Pretty Heatmaps (version 1.0.12)**. In.; 2019.
- 1645 210. Garnier S, Ross N, Rudis B, Sciaini M, Scherer C: **viridis: Default Color Maps from**  
1646 **'matplotlib'**. *R package version 05* 2018, **1**.
- 1647 211. Conway JR, Lex A, Gehlenborg N: **UpSetR: an R package for the visualization of**  
1648 **intersecting sets and their properties**. *Bioinformatics* 2017, **33(18):2938-2940**.
- 1649

1650 **Additional Files**

1651 Additional File 1.

1652 Ultradian rhythms in colony behavior. **(A)** The length of day (daylength in hours, top) and  
1653 dusk (twilight in minutes, bottom) in Orlando, for every single day in 2019, is shown. Data  
1654 was obtained from [www.timeanddate.com](http://www.timeanddate.com). The vertical grey line indicates the time-of-year  
1655 (May, 2019) during which the *C. floridanus* colony was collected and all experiments were  
1656 performed. **(B)** Recreated activity profiles of feeding bouts (shown in red lines) using  
1657 decomposed 24h, 12h, and both (12h+24h) waveforms plotted on top of the observed activity  
1658 data (black lines). The vertical dashed lines indicate the time period during which the 12h  
1659 rhythms were found to be significant. The x-axis shows the Cumulative ZT (in hours) since  
1660 mark-and-recapture. The y-axis indicates colony feeding activity (FS) as the number of ants  
1661 present on the feeding stage at a given time point. The 12h:12h light-dark cycles are indicated  
1662 in white (lights on) and grey (lights off) at the top. (PNG, 620 KB)

1663

1664 Additional File 2.

1665 General patterns of gene expression in forager and nurse ants. The excel file contains four  
1666 worksheets. **(Sheet 1)** The excel worksheet contains list of genes that displayed “no  
1667 expression” (FPKM = 0) and “low expression” ( $0 < \text{FPKM} < 1$ ) in the brains of *C. floridanus*  
1668 foragers and nurses. In addition to the gene symbols (column: gene\_name), the blast  
1669 annotation (column: blast\_annotation) and expression data for foragers (column: X2F to  
1670 X24F) and nurses (column: X2N to X24N) are also provided. **(Sheet 2)** Results of GO  
1671 enrichment analyses for genes that show “no expression” and “low expression”. **(Sheet 3)**  
1672 List of genes that are expressed only in forager brains or nurse brains. **(Sheet 4)** Results of  
1673 GO enrichment analyses for genes expressed only in forager brains or nurse brains. (XLS, 1.7  
1674 MB)

1675

1676 Additional File 3.

1677 Circadian gene expression in forager and nurse brains. The excel file contains five  
1678 worksheets. **(Sheet 1)** eTJK output for all tested genes in forager brains, including their gene  
1679 number and normalized expression levels for each time point, sorted based on significance.  
1680 **(Sheet 2)** eTJK output for all tested genes in nurse brains, including their gene number and  
1681 normalized expression levels for each time point, sorted based on significance. **(Sheet 3)** List  
1682 of genes that show significant 24h rhythms in forager brains, their cluster identity  
1683 (corresponding to Fig. 3B), and normalized gene expression for all forager samples. **(Sheet 4)**  
1684 List of genes that show significant 24h rhythms in nurse brains, their cluster identity  
1685 (corresponding to Fig. 3C), and normalized gene expression for all nurse samples. **(Sheet 5)**  
1686 GO enrichment results for circadian genes in foragers (for-24h) and nurses (nur-24h) that  
1687 peak during the day (day-peaking clusters) and night (night-peaking clusters). Also includes  
1688 the enrichment results for day-peaking cluster of overlapping for-24h and nur-24h genes (for-  
1689 24h-nur-24h). (XLS, 12.6 MB)

1690

1691 Additional File 4.

1692 Core clock and clock-controlled genes in *C. floridanus*. The excel worksheet contains the list  
1693 of fly- and mammalian-like core clock genes and clock-controlled genes identified in *C.*  
1694 *floridanus*, along with the hmmersearch results. (XLS, 39 KB)

1695

1696 Additional File 5.

1697 The figure shows the expression patterns of several genes with a rhythmic trend that are  
1698 discussed in the text. The forager expression is shown in red and nurse expression in blue.  
1699 For each gene, the periodicity of rhythmic expression tested in forager and nurse brains are

1700 shown along with p-values obtained from eJTK (in parenthesis). The y-axis shows gene  
1701 expression (z-score) and the x-axis shows the Zeitgeber Time (in hours). Dark phase of the  
1702 12h:12h light-dark cycle is represented in grey (dark phase begins at ZT12). (PNG, 1.1 MB)

1703

1704 Additional File 6.

1705 Ultradian gene expression in forager and nurse brains. The excel file contains four  
1706 worksheets. (**Sheet 1**) Results of eTJK testing for significant 12h periodicity in forager brain  
1707 gene expression. (**Sheet 2**) Results of eTJK testing for significant 12h periodicity in nurse  
1708 brain gene expression. (**Sheet 3**) Results of eTJK testing for significant 8h periodicity in  
1709 forager brain gene expression. (**Sheet 4**) Results of eTJK testing for significant 8h periodicity  
1710 in nurse brain gene expression. (XLS, 14.1 MB)

1711

1712 Additional File 7.

1713 Differentially rhythmic genes. The excel file contains two worksheets. (**Sheet 1**) List of genes  
1714 that cycle every 24h in forager brains but every 8h in nurses (for-24h-nur-8h). In addition to  
1715 gene symbol, gene annotations and normalized expression, the cluster identity of each gene  
1716 upon hierarchical clustering is provided. (**Sheet 2**) GO enrichment results for “for-24h-nur-  
1717 8h” genes belonging to cluster 1 that also contains the *Per* gene. (XLS, 251 KB)

1718

1719 Additional File 8.

1720 Components of mammalian circadian entrainment pathway. The excel worksheet contains a  
1721 list of mammalian genes that are involved in circadian entrainment pathway (KEGG  
1722 pathway: hsa04713) and their orthologs in *C. floridanus* (if present). Additionally, the  
1723 annotation, results from eJTK and normalized expression of *C. floridanus* orthologs is  
1724 provided. (XLS, 48 KB)

1725

1726 Additional File 9.

1727 Genes differently expressed between forager and nurse brains. The excel file contains three  
1728 worksheets. (**Sheet 1**) LimoRhyde results for all genes tested for differential gene expression.  
1729 (**Sheet 2**) GO enrichment results for genes significantly higher expressed in nurse brains as  
1730 compared to forager brains. (XLS, 1.9 MB)

1731

1732 Additional File 10.

1733 Abiotic conditions in the experimental foraging arena and the nest box. The figure shows the  
1734 data for light intensity, temperature and humidity in the foraging arena and the nest box of the  
1735 experimental setup, collected using HOBO data loggers. Data is shown for Day 12 and Day  
1736 13 of the experiment. (PNG, 600 KB)

1737

1738 Additional File 11.

1739 Ant colony setup and experimental design. (**A**) The figure shows the ant colony setup used  
1740 for the experiment. The scheme for sampling ants from the colony is shown in (**B**) and  
1741 several of the key steps from sampling to RNASeq are shown in (**C**). (PNG, 777 KB)

1742

1743 Additional File 12.

1744 Colony foraging and feeding activity data. The excel worksheet contains the number of ants  
1745 observed on the feeding stage (FS) and involved in general foraging activity (FA). Total  
1746 activity (Total) was defined as the sum of FS and FA. Experimental phases: Initial  
1747 entrainment (Entrain-I), Mark-and-recapture (Painting), Pre-sampling entrainment (Entrain-  
1748 II), Sampling, and Post-sampling entrainment (Entrain-III). (CSV, 45 KB)
